# Supplementary material for: Rhodium-catalyzed cycloaddition of carbonyl ylides for the synthesis of spiro[furo[2,3-a]xanthene-2,3′-indolin]-2′-one scaffolds
Source: Royal Society of Chemistry journal article supplement (doi:10.1039/c6ra05661j), 2016-01-01

**Supporting Information for**

**Rhodium-catalyzed cycloaddition of carbonyl ylides for the synthesis of  
spiro [furo[2,3-a]xanthene-2,3'-indolin]-2'-one scaffolds**

B. V. Subba Reddy,<sup>\*a</sup> E. Pravardhan Reddy,<sup>b,d</sup> B. Sridhar,<sup>c</sup>  
Y. Jayaprakash Rao<sup>\*b, d</sup>

<sup>a</sup>Centre for Semiochemicals, <sup>c</sup>Laboratory of X-ray Crystallography, CSIR-Indian Institute of Chemical Technology, Hyderabad, 500 007, India. E-mail: basireddy@iict.res.in; <sup>b</sup>Department of Chemistry, Osmania University, Hyderabad-500 007, India. <sup>d</sup>Department of Chemistry, Telangana University, Nizamabad-503 322, India.

**Table of Contents**

|                                                                                   |               |
|-----------------------------------------------------------------------------------|---------------|
| <b>1. General methods.....</b>                                                    | <b>S1</b>     |
| <b>2. Experimental procedures.....</b>                                            | <b>S1-4</b>   |
| <b>3. Characterization data of products (3a-n).....</b>                           | <b>S5-14</b>  |
| <b>4. Copies of <sup>1</sup>H and <sup>13</sup>C NMR spectra of products.....</b> | <b>S15-31</b> |
| <b>5. X-ray crystal structure of 3a.....</b>                                      | <b>S32</b>    |
| <b>6. Preparation of starting material 2x.....</b>                                | <b>S33-40</b> |

**General methods.** All solvents were dried according to standard literature procedures. Unless otherwise noted, reactions were performed in flame-dried glassware under an atmosphere of dry argon. Dichloroethane was dried over Calcium hydride prior to use.  $^1\text{H}$  NMR spectra were recorded at 500 MHz, 300 MHz and 400 MHz and  $^{13}\text{C}$  NMR at 125 MHz, 100 MHz and 75MHz. For  $^1\text{H}$  NMR, tetramethylsilane (TMS) was used as internal standard ( $\delta = 0$ ) and the values are reported as follows: chemical shift, multiplicity, integration (s = singlet, d = doublet, t= triplet, q = quartet, m = multiplet, dd = doublet of doublet), and the coupling constants in Hz. For  $^{13}\text{C}$  NMR,  $\text{CDCl}_3$  ( $\delta = 77.00$ ) was used as internal standard and spectra were obtained with complete proton decoupling. Low-resolution MS and HRMS data were obtained using ESI ionization. IR spectra were recorded on FT-IR spectrometer (KBr) and reported in reciprocal centimeters ( $\text{cm}^{-1}$ ). Melting points were measured on micro melting point apparatus. Glass syringes were used to transfer solvents. Crude products were purified by column chromatography on silica gel of 60–120 or 100-200 mesh. Thin layer chromatography plates were visualized by exposure to ultraviolet light and/or by exposure to iodine vapours and/or by exposure to methanolic acidic solution of 2-naphthol followed by heating (<1 min) on a hot plate ( $\sim 250^\circ\text{C}$ ). 3-Diazoindole, 3-arylidene oxindole and were prepared according to the literature procedure

## 2. Experimental procedures

### a) Preparation of 2-methyl-2-(4-methylpent-3-en-1-yl)-2H-chromene-3-carbaldehyde:

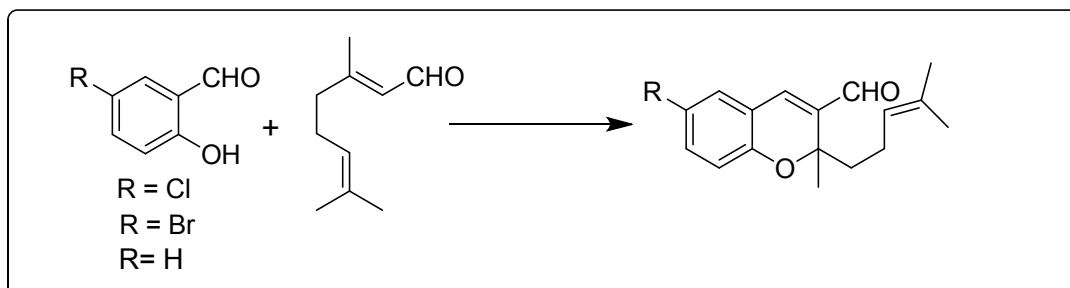

**Reagents & conditions:**  $K_2CO_3$ , 1, 4-dioxane, 3 days.

### b) Preparation of 3-diazo-1-methylindolin-2-one:

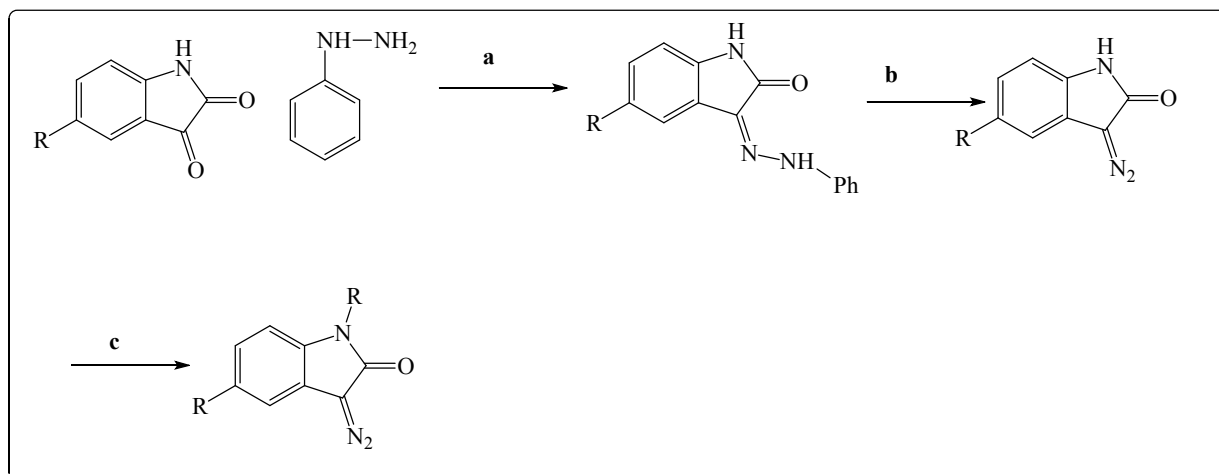

**Reagents & conditions:** (a) MeOH, 0 °C, 12h (b) 4N NaOH, 45 °C, 4h; (c) R-Br,  $K_2CO_3$ , DMF, 25 °C, 15h.

### c) Preparation of the 2-methyl-2-(4-methylpent-3-en-1-yl)-2H-chromene-3-carbaldehyde:

A solution of sodium carbonate (14.08 mmol, 1.4 g) in water (5 mL) was stirred at 25 °C. After complete dissolution of sodium carbonate, a solution of salicylaldehyde (12.8 mmol, 2 g) in 1, 4-dioxane (15 mL) was added at 0 °C. After 15 min, citral (38.4 mmol, 6.61 mL) was added at room temperature. The resulting mixture was stirred at 55 °C for 72 h. After completion, as monitored by TLC, the reaction mixture was extracted with ethyl acetate and washed with brine solution. Removal of the solvent followed by purification on silica gel

column chromatography using a gradient mixture of EtOAc/hexane (1:9) afforded the 2-methyl-2-(4-methylpent-3-enyl)-2*H*-chromene-3-carbaldehyde in 60% yield.

**d) Preparation of the 3-diazooxindoles:**

A mixture of isatin (2.0 g, 13.6 mmol) and TsNHNH<sub>2</sub> (2.66 g, 14.3 mmol) in MeOH (20 mL) was stirred at 25 °C for 1 h and then the mixture was cooled and filtered. The filtrate was treated with 4N aq. NaOH solution and stirred at 45 °C for 4 h. After being cooled to ambient temperature, the reaction mixture was neutralized with dry ice. The red solid was filtered off and dried under air to give the 3-diazooxindole (1.8 g, 83% over two steps), which was used in the next step without further purification.

A mixture of 3-diazooxindole (1.0 g, 6.3 mmol), K<sub>2</sub>CO<sub>3</sub> (1.0 g, 7.5 mmol) and CH<sub>3</sub>I (0.82 mL, 6.9 mmol) was stirred in DMF (6 mL) at room temperature for 15 h. Then the mixture was diluted with ether and washed with water (60 mL × 3). The combined organic layers were dried over Na<sub>2</sub>SO<sub>4</sub> and the solvent was removed under reduced pressure. The resulting residue was purified by flash chromatography to give the *N*-methyl-3-diazooxindole **1a** (1.4 g, 89%) as an orange solid. The NMR spectral data was consistent with the data reported in literature. Other 3-diazooxindoles were prepared following a similar method.

**e) Typical experimental procedure:**

To a solution of 2-methyl-2-(4-methylpent-3-enyl)-2*H*-chromene-3-carbaldehyde **2** (1.1 equiv) and Rh<sub>2</sub>(OAc)<sub>4</sub> (5 mol-%) in dry dichloroethane under argon at room temperature was added slowly a solution of diazooxindole **1** (1 equiv.) through a syringe pump over 20 min. After addition, the mixture was stirred for another 10 min. The progress of the reaction was monitored by TLC; upon completion, the solvent was removed under reduced pressure and the residue was purified by column chromatography on silica gel (EtOAc/hexane) to give the pure product.

### 3. Characterization data of compounds 3(a-p)

#### 1',3,3,5a-Tetramethyl-3,3a,4,5,5a,11b-hexahydrospiro[furo[2,3-a]xanthene-2,3'-indolin]-2'-one (3a):

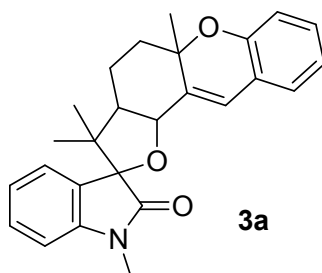

Colorless solid. m.p: 210-211 °C; <sup>1</sup>H NMR (500 MHz, CDCl<sub>3</sub>) δ 7.32 (d, *J* = 7.4 Hz, 1H), 7.28 – 7.23 (m, 1H), 7.14 – 7.09 (m, 1H), 7.05 – 6.98 (m, 2H), 6.87 – 6.72 (m, 1H), 6.79 (d, *J* = 8.0 Hz, 1H), 6.74 (d, *J* = 7.7 Hz, 1H), 6.63 (s, 1H), 5.37 – 5.34 (m, 1H), 3.09 (s, 3H), 2.21 – 2.16 (m, 1H), 2.05 – 1.85 (m, 4H), 1.52 (s, 3H), 1.38 (s, 3H), 0.88 (s, 3H); <sup>13</sup>C NMR (125 MHz, CDCl<sub>3</sub>) δ 179.0, 152.9, 144.9, 134.0, 129.5, 129.4, 128.8, 126.8, 126.1, 126.1, 122.1, 122.0, 121.1, 116.2, 108.2, 88.6, 80.7, 77.4, 50.9, 47.9, 38.1, 29.5, 26.2, 24.5, 24.4, 21.9; IR (KBr):  $\nu_{\max}$  3426, 2923, 2851, 1688, 1488, 1457, 1244, 1117, 1039, 753 cm<sup>-1</sup>; MS (EI): *m/z* ([M+H]<sup>+</sup>): 402; HRMS (EI): *m/z* calcd C<sub>26</sub>H<sub>28</sub>NO<sub>3</sub>: 402.20637; found: 402.20804.

#### 9-Chloro-1',3,3,5a-tetramethyl-3,3a,4,5,5a,11-hexahydrospiro[furo[2,3-a]xanthene-2,3'-indolin]-2'-one (3b):

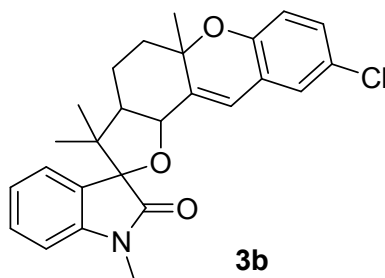

Colorless solid. m.p:180-181 °C; <sup>1</sup>H NMR (500 MHz, CDCl<sub>3</sub>) δ 7.32 – 7.23 (m, 2H), 7.08 – 7.00 (m, 2H), 6.97 – 6.95 (m, 1H), 6.73 (dd, *J* = 13.3, 8.2 Hz, 2H), 6.55 (s, 1H), 5.35 – 5.32 (m, 1H), 3.10 (s, 3H), 2.20 – 2.14 (m, 1H), 2.02 – 1.85 (m, 4H), 1.51 (s, 3H), 1.38 (s, 3H), 0.88 (s, 3H); <sup>13</sup>C NMR (125 MHz, CDCl<sub>3</sub>) δ 178.9, 151.5, 144.5, 135.5, 129.5, 129.1, 128.6, 126.2, 126.1, 125.8, 125.0, 123.4, 122.0, 117.5, 108.3, 88.9, 80.4, 77.9, 50.9, 47.9, 38.0, 29.4, 26.2, 24.5, 24.4, 21.9; IR (KBr):  $\nu_{\max}$  3435, 2932, 2862, 1656, 1484, 1455, 1243, 1127, 1049, 763 cm<sup>-1</sup>; MS (EI): *m/z* ([M+H]<sup>+</sup>): 436; HRMS (EI): *m/z* calcd for C<sub>26</sub>H<sub>27</sub>ClNO<sub>3</sub>: 436.16740; found: 436.16953.

**9-Bromo-1',3,3,5a-tetramethyl-3,3a,4,5,5a,11b-hexahydrospiro[furo[2,3-a]xanthene-2,3'-indolin]-2'-one (3c) :**

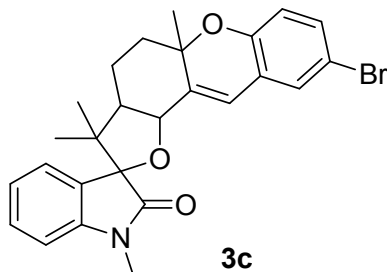

Colorless solid. m.p: 220-221 °C;  $^1\text{H}$  NMR (500 MHz,  $\text{CDCl}_3$ )  $\delta$  7.32 – 7.24 (m, 2H), 7.21 – 7.18 (m, 1H), 7.11 – 7.08 (m, 1H), 7.05 – 6.98 (m, 1H), 6.75 (d,  $J = 7.7$  Hz, 1H), 6.67 (d,  $J = 8.6$  Hz, 1H), 6.54 (s, 1H), 5.35 – 5.32 (m, 1H), 3.10 (s, 3H), 2.19 – 2.15 (m, 1H), 2.02 – 1.84 (m, 4H), 1.51 (s, 3H), 1.38 (s, 3H), 0.88 (s, 3H);  $^{13}\text{C}$  NMR (100 MHz,  $\text{CDCl}_3$ )  $\delta$  178.8, 152.0, 144.5, 135.5, 132.0, 129.5, 129.0, 128.6, 126.1, 124.8, 123.9, 122.0, 118.0, 113.0, 108.3, 88.7, 80.4, 77.9, 50.9, 47.9, 47.9, 38.0, 29.4, 26.2, 24.1, 21.9; IR (KBr):  $\nu_{\text{max}}$  3447, 3060, 2971, 1740, 1375, 1286, 1008, 981, 872, 781  $\text{cm}^{-1}$ ; MS (EI):  $m/z$  ( $[\text{M}+\text{H}]^+$ ): 480; HRMS (EI):  $m/z$  calcd for  $\text{C}_{26}\text{H}_{27}\text{BrNO}_3$ : 480.39354; found: 480.39344.

**5'-Chloro-1',3,3,5a-tetramethyl-3,3a,4,5,5a,11b-hexahydrospiro[furo[2,3-a]xanthene-2,3'-indolin]-2'-one (3d):**

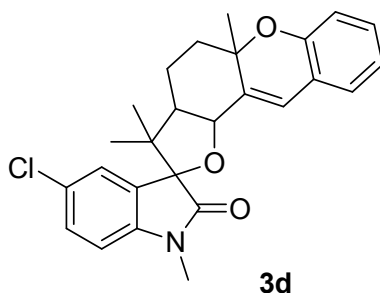

Colorless solid. m.p: 215-216 °C;  $^1\text{H}$  NMR (500 MHz,  $\text{CDCl}_3$ )  $\delta$  7.41 – 7.35 (m, 2H), 7.15 – 7.10 (m, 1H), 7.02 – 6.99 (m, 1H), 6.88 – 6.78 (m, 2H), 6.63 (d,  $J = 7.9$  Hz, 2H), 5.36 – 5.33 (m, 1H), 3.08 (s, 3H), 2.20 – (m, 1H), 2.05 – 1.79 (m, 4H), 1.51 (s, 3H), 1.37 (s, 3H), 0.90 (s, 3H);  $^{13}\text{C}$  NMR (125 MHz,  $\text{CDCl}_3$ )  $\delta$  178.4, 152.9, 143.6, 133.7, 132.3, 130.8, 129.6, 129.1, 126.8, 126.3, 122.0, 121.2, 116.3, 114.7, 109.7, 88.5, 80.9, 80.7, 50.8, 48.2, 37.9, 29.4, 26.3, 24.6, 24.4, 22.1; IR (KBr):  $\nu_{\text{max}}$  3441, 3056, 2964, 1593, 1512, 1459, 1299, 1246, 1173, 1112,

1031, 754  $\text{cm}^{-1}$ ; MS (EI):  $m/z$  ( $[\text{M}+\text{H}]^+$ ): 436; HRMS (EI):  $m/z$  calcd for  $\text{C}_{26}\text{H}_{27}\text{ClNO}_3$ ; 436.16740; found: 436.16952.

**5',9-Dichloro-1',3,3,5a-tetramethyl-3,3a,4,5,5a,11b-hexahydrospiro[furo[2,3-a]xanthene-2,3'-indolin]-2'-one (3e):**

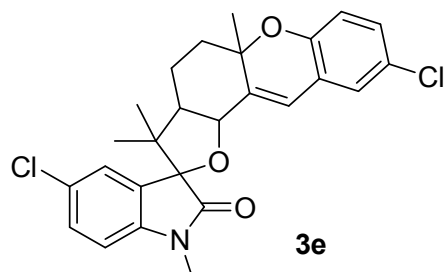

Colorless solid. m.p: 239-240  $^{\circ}\text{C}$ ;  $^1\text{H}$  NMR (400 MHz,  $\text{CDCl}_3$ )  $\delta$  7.43 – 7.38 (m, 1H), 7.37 – 7.34 (m, 1H), 7.10 – 7.04 (m, 1H), 6.99 – 6.95 (m, 1H), 6.73 (d,  $J = 8.6$  Hz, 1H), 6.63 (d,  $J = 8.3$  Hz, 1H), 6.55 (s, 1H), 5.35 – 5.31 (m, 1H), 3.08 (s, 3H), 2.24 – 2.15 (m, 1H), 2.03 – 1.79 (m, 4H), 1.50 (s, 3H), 1.36 (s, 3H), 0.90 (s, 3H);  $^{13}\text{C}$  NMR (100 MHz,  $\text{CDCl}_3$ )  $\delta$  178.3, 151.5, 143.6, 135.2, 132.3, 130.6, 129.2, 129.1, 126.2, 125.2, 123.3, 117.6, 114.7, 109.8, 88.5, 80.7, 50.8, 48.2, 37.8, 29.3, 26.4, 24.6, 24.4, 22.0; IR (KBr):  $\nu_{\text{max}}$  3412, 3059, 2856, 1712, 1388, 1260, 1242, 1030, 881, 744  $\text{cm}^{-1}$ ; MS (EI):  $m/z$  ( $[\text{M}+\text{H}]^+$ ): 470; HRMS (EI):  $m/z$  calcd for  $\text{C}_{26}\text{H}_{26}\text{Cl}_2\text{NO}_3$ ; 470.38760; found: 470.38732.

**9-Bromo-5'-chloro-1',3,3,5a-tetramethyl-3,3a,4,5,5a,11b-hexahydrospiro[furo[2,3-a]xanthene-2,3'-indolin]-2'-one (3f):**

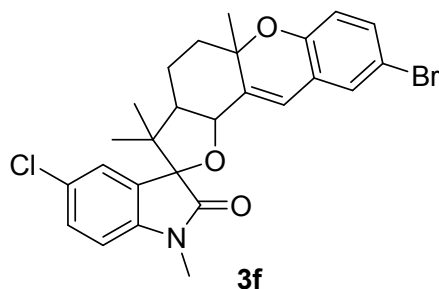

Colourless solid. m.p. 256-257  $^{\circ}\text{C}$ ;  $^1\text{H}$  NMR (300 MHz,  $\text{CDCl}_3$ ):  $\delta$  7.43-7.33 (m, 2H), 7.24 – 7.18 (m, 1H), 7.12 – 7.08 (m, 1H), 6.66 (dd,  $J=14.2,8.4\text{Hz}$ , 2H), 6.54 (s, 1H), 5.35 – 5.29 (m, 1H), 3.08 (s, 3H), 2.25 – 2.13 (m, 1H), 2.05 – 1.77 (m, 4H), 1.50 (s, 3H), 1.36 (s, 3H), 0.90 (s, 3H);  $^{13}\text{C}$  NMR (100 MHz,  $\text{CDCl}_3$ ):  $\delta$  178.2, 152.0, 143.5, 135.1, 132.3, 132.1, 130.6, 129.1, 129.0, 125.1, 123.8, 118.1, 114.7, 113.0, 109.7, 80.5, 80.6, 77.7, 50.7, 48.2, 37.8, 29.7, 29.3,

26.3, 24.6, 24.4, 21.9; IR (KBr):  $\nu_{\max}$  3425, 3056, 2996, 1721, 1606, 1331, 1299, 1246, 1159, 1016, 804, 702  $\text{cm}^{-1}$ ; MS (EI):  $m/z$  ( $[M+H]^+$ ): 514; HRMS (EI):  $m/z$  calcd for  $\text{C}_{26}\text{H}_{26}\text{BrClNO}_3$ : 514.83860; found: 514.83845.

**1'-Benzyl-3,3,5a-trimethyl-3,3a,4,5,5a,11b-hexahydrospiro[furo[2,3-a]xanthene-2,3'-indolin]-2'-one(3g):**

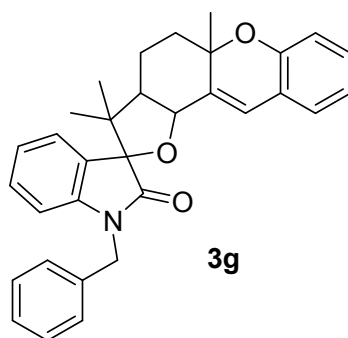

Colorless solid. m.p: 205-206 °C;  $^1\text{H}$  NMR (500 MHz,  $\text{CDCl}_3$ ) 7.38 – 7.22 (m, 7H), 7.16 – 7.09 (m, 1H), 7.06 – 6.95 (m, 2H), 6.90 – 6.82 (m, 1H), 6.80 (d,  $J = 8.0$  Hz, 1H), 6.66 (s, 1H), 6.62 (d,  $J = 7.8$  Hz, 1H), 5.39 – (m, 1H), 5.12 (d,  $J = 15.8$  Hz, 1H), 4.46 (d,  $J = 15.8$  Hz, 1H), 2.30 – 2.13 (m, 1H), 2.10 – 1.77 (m, 4H), 1.53 (s, 3H), 1.43 (s, 3H), 0.90 (s, 3H);  $^{13}\text{C}$  NMR (75 MHz,  $\text{CDCl}_3$ )  $\delta$  178.9, 152.9, 143.6, 135.9, 134.0, 129.5, 129.3, 128.8, 127.6, 127.2, 126.8, 126.2, 126.1, 122.0, 121.2, 116.2, 109.2, 88.7, 80.8, 50.9, 48.2, 43.8, 38.1, 29.7, 24.62, 24.4, 21.9; IR (KBr):  $\nu_{\max}$  3423, 3059, 2963, 2788, 1755, 1482, 1370, 1123, 873, 720  $\text{cm}^{-1}$ ; MS (EI):  $m/z$  ( $[M+H]^+$ ): 478; HRMS (EI):  $m/z$  calcd for  $\text{C}_{32}\text{H}_{32}\text{NO}_3$ : 478.23767; found: 478.23999.

**1'-Benzyl-9-chloro-3,3,5a-trimethyl-3,3a,4,5,5a,11b-hexahydrospiro[furo[2,3a]xanthene-2,3'-indolin]-2'-one(3h):**

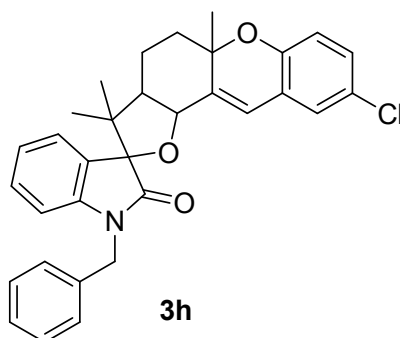



Colorless solid. m.p: 220-221 °C; <sup>1</sup>H NMR (400 MHz, CDCl<sub>3</sub>) δ 7.36 – 7.26 (m, 6H), 7.17 – 7.11 (m, 1H), 7.09 – 7.04 (m, 1H), 7.02 – 6.97 (m, 2H), 6.73 (d, *J* = 8.6 Hz, 1H), 6.62 (d, *J* = 7.6 Hz, 1H), 6.58 (s, 1H), 5.40 – 5.35 (m, 1H), 5.13 (d, *J* = 15.8 Hz, 1H), 4.46 (d, *J* = 15.8 Hz, 1H), 2.22 – 2.15 (m, 1H), 2.07 – 1.85 (m, 4H), 1.53 (s, 3H), 1.43 (s, 3H), 0.90 (s, 3H) ; <sup>13</sup>C NMR (100 MHz, CDCl<sub>3</sub>) δ 178.8, 151.5, 143.6, 135.9, 135.5, 129.4, 129.1, 128.9, 128.6, 127.6, 127.2, 126.2, 126.1, 125.8, 125.1, 123.4, 122.1, 117.6, 109.2, 88.8, 80.6, 77.8, 50.9, 48.2, 43.8, 38.0, 29.9, 24.6, 24.4, 21.9; IR (KBr): ν<sub>max</sub> 3425, 3065, 2926, 2856, 1726, 1479, 1259, 1176, 1071, 702 cm<sup>-1</sup>; MS (EI): *m/z* ([M+H]<sup>+</sup>): 512; HRMS (EI): *m/z* calcd for C<sub>32</sub>H<sub>31</sub>ClNO<sub>3</sub>: 512.19897; found: 512.20099.

**1'-Benzyl-9-bromo-3,3,5a-trimethyl-3,3a,4,5,5a,11b-hexahydrospiro[furo[2,3a]xanthene-2,3'-indolin]-2'-one(3i):**

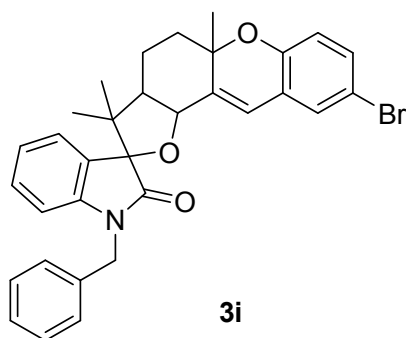

Colorless solid. m.p. 225-226 °C; <sup>1</sup>H NMR (400 MHz, CDCl<sub>3</sub>) δ 7.36 – 7.26 (m, 6H), 7.23 – 7.17 (m, 1H), 7.16 – 7.14 (m, 1H), 7.13 – 7.11 (m, 1H), 7.03 – 6.98 (m, 1H), 6.68 (d, *J* = 8.5 Hz, 1H), 6.62 (d, *J* = 7.7 Hz, 1H), 6.57 (s, 1H), 5.40 – 5.35 (m, 1H), 5.13 (d, *J* = 15.8 Hz, 1H), 4.46 (d, *J* = 15.8 Hz, 1H), 2.23 – 2.14 (m, 1H), 2.04 – 1.83 (m, 4H), 1.53 (s, 3H), 1.43 (s, 3H), 0.90 (s, 3H); <sup>13</sup>C NMR (101 MHz, CDCl<sub>3</sub>) δ 178.8, 152.0, 146.1, 143.6, 135.9, 135.5, 132.1, 129.4, 129.1, 128.9, 128.6, 127.6, 127.2, 126.2, 124.9, 124.0, 122.1, 118.0, 113.1, 109.2, 88.8, 80.6, 77.9, 50.9, 48.2, 43.8, 38.0, 29.9, 24.6, 24.5, 21.9; IR (KBr): ν<sub>max</sub> 3445, 3056, 2929, 2862, 1745, 1482, 1276, 1125, 1068, 757 cm<sup>-1</sup>; MS (EI): *m/z* ([M+H]<sup>+</sup>): 556; HRMS (EI): *m/z* calcd for C<sub>32</sub>H<sub>31</sub>BrNO<sub>3</sub>: 556.13026; found: 556.13033.

**1'-Benzyl-5'-bromo-3,3,5a-trimethyl-3,3a,4,5,5a,11b-hexahydrospiro[furo[2,3-a]xanthene-2,3'-indolin]-2'-one (3j):**

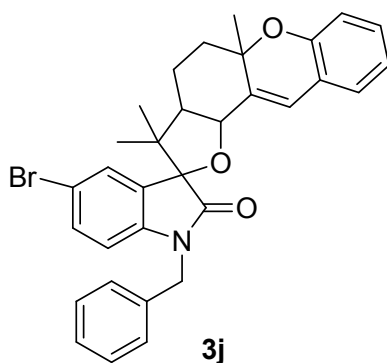

Colorless solid. m.p. 238-240 °C; <sup>1</sup>H NMR (500 MHz, CDCl<sub>3</sub>) δ 7.39 – 7.36 (m, 1H), 7.33 (t, *J* = 7.2 Hz, 2H), 7.28 – 7.24 (m, 4H), 7.16 – 7.10 (m, 1H), 7.05 – 6.90 (m, 1H), 6.89 – 6.83 (m, 2H), 6.66 (s, 1H), 6.49 (d, *J* = 8.3 Hz, 1H), 5.41 – 5.36 (m, 1H), 5.08 (d, *J* = 15.8 Hz, 1H), 4.48 (d, *J* = 15.8 Hz, 1H), 2.24 – 2.17 (m, 1H), 2.05 – 1.95 (m, 2H), 1.87 – (m, 2H), 1.53 (s, 3H), 1.42 (s, 3H), 0.92 (s, 3H); <sup>13</sup>C NMR (125 MHz, CDCl<sub>3</sub>) δ 178.3, 153.0, 142.6, 135.4, 133.6, 132.1, 130.8, 129.6, 129.1, 128.9, 127.8, 127.2, 126.9, 126.5, 122.0, 121.2, 116.3, 114.8, 110.6, 88.6, 81.1, 50.8, 48.5, 43.9, 38.0, 29.6, 24.7, 24.5, 22.1; IR (KBr): ν<sub>max</sub> 3421, 3059, 2925, 2856, 1721, 1606, 1259, 933, 804 cm<sup>-1</sup>; MS (EI): *m/z* ([M+H]<sup>+</sup>): 556; HRMS (EI): *m/z* calcd for C<sub>32</sub>H<sub>31</sub>BrNO<sub>3</sub>: 556.13026; found: 556.13033.

**1'-Benzyl-5'-bromo-9-chloro-3,3,5a-trimethyl-3,3a,4,5,5a,11b-hexahydrospiro[furo[2,3-a]xanthene-2,3'-indolin]-2'-one) (3k):**

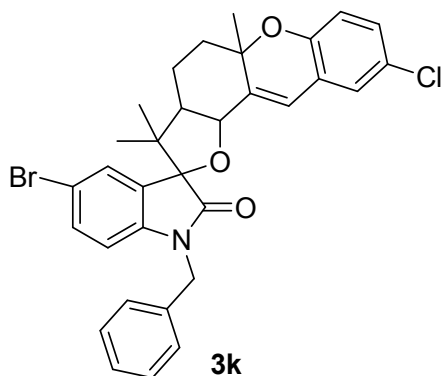

Colorless solid. m.p. 215-216 °C; <sup>1</sup>H NMR (500 MHz, CDCl<sub>3</sub>) δ 7.37 – 7.23 (m, 7H), 7.10 – 7.05 (m, 1H), 7.01 – 6.97 (m, 1H), 6.74 (d, *J* = 8.6 Hz, 1H), 6.58 (s, 1H), 6.49 (d, *J* = 8.3 Hz, 1H), 5.40 – 5.35 (m, 1H), 5.08 (d, *J* = 15.8 Hz, 1H), 4.48 (d, *J* = 15.8 Hz, 1H), 2.22 (s, 1H), 2.04 – 1.95 (m, 2H), 1.92 – 1.80 (m, 2H), 1.52 (s, 3H), 1.42 (s, 3H), 0.92 (s, 3H); <sup>13</sup>C NMR (125 MHz, CDCl<sub>3</sub>) δ 178.2, 151.5, 142.6, 135.3, 135.1, 132.2, 130.7, 129.3, 129.1, 129.0, 127.8, 127.1, 126.2, 125.8, 125.4, 123.3, 117.6, 114.8, 110.7, 88.7, 80.8, 77.7, 50.8, 48.5,

43.9, 37.9, 29.6, 24.7, 24.4, 22.0; IR (KBr):  $\nu_{\max}$  3425, 3065, 2925, 1741, 1612, 1495, 1245, 1176, 1113, 770  $\text{cm}^{-1}$ ; MS (EI):  $m/z$  ( $[M+H]^+$ ): 590; HRMS (EI):  $m/z$  calcd for  $\text{C}_{32}\text{H}_{30}\text{BrClNO}_3$ : 590.10921; found: 590.11166.

**1'-Benzyl-5',9-dibromo-3,3,5a-trimethyl-3,3a,4,5,5a,11b-hexahydrospiro[furo[2,3-a]xanthene-2,3'-indolin]-2'-one (3l) :**

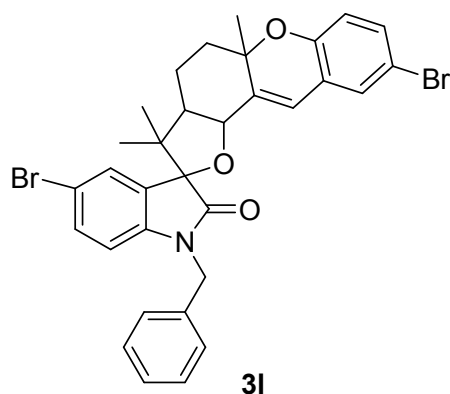

Colorless solid. m.p. 245-250 °C;  $^1\text{H}$  NMR (500 MHz,  $\text{CDCl}_3$ )  $\delta$  7.36 – 7.27 (m, 5H), 7.26 – 7.20 (m, 3H), 7.14 – 7.10 (m, 1H), 6.69 (d,  $J = 8.6$  Hz, 1H), 6.57 (s, 1H), 6.49 (d,  $J = 8.3$  Hz, 1H), 5.39 – 5.34 (m, 1H), 5.08 (d,  $J = 15.8$  Hz, 1H), 4.48 (d,  $J = 15.8$  Hz, 1H), 2.22 – 2.17 (m, 1H), 2.03 – 1.95 (m, 2H), 1.91 – 1.81 (m, 2H), 1.52 (s, 3H), 1.42 (s, 3H), 0.92 (s, 3H);  $^{13}\text{C}$  NMR (125 MHz,  $\text{CDCl}_3$ )  $\delta$  178.2, 152.0, 142.8, 142.7, 142.6, 135.3, 135.1, 132.2, 130.7, 129.1, 129.0, 127.8, 127.1, 125.2, 123.9, 118.1, 114.8, 113.1, 110.7, 88.7, 80.8, 77.7, 50.8, 48.5, 43.9, 37.9, 29.6, 24.7, 24.5, 22.0; IR (KBr):  $\nu_{\max}$  3431, 2915, 2839, 1607, 1489, 1453, 1244, 1109, 1033, 824  $\text{cm}^{-1}$ ; MS (EI):  $m/z$  ( $[M+H]^+$ ): 634; HRMS (EI):  $m/z$  calcd for  $\text{C}_{32}\text{H}_{30}\text{Br}_2\text{NO}_3$ : 634.16740; found: 634.16990.

**3,3,5a-Trimethyl-1'-(prop-2-yn-1-yl)-3,3a,4,5,5a,11b-hexahydrospiro[furo[2,3-a]xanthene-2,3'-indolin]-2'-one (3m):**

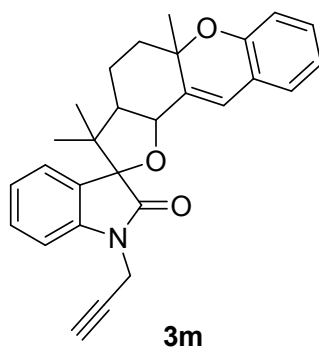

Colorless solid. m.p. 225-226 °C;  $^1\text{H}$  NMR (500 MHz,  $\text{CDCl}_3$ )  $\delta$  7.33 (d,  $J = 7.4$  Hz, 1H), 7.31 – 7.27 (m, 1H), 7.16 – 7.09 (m, 1H), 7.08 – 7.04 (m, 1H), 7.02 – 6.95 (m, 2H), 6.88 – 6.83 (m, 1H), 6.79 (d,  $J = 8.1$  Hz, 1H), 6.63 (s, 1H), 5.37 – 5.32 (m, 1H), 4.61 – 4.54 (m, 1H), 4.25 – 4.15 (m, 1H), 2.22 – 2.16 (m, 2H), 2.05 – 1.84 (m, 4H), 1.53 (s, 3H), 1.38 (s, 3H), 0.88 (s, 3H).;  $^{13}\text{C}$  NMR (125 MHz,  $\text{CDCl}_3$ )  $\delta$  178.1, 152.9, 142.5, 133.9, 129.5, 129.3, 128.7, 126.8, 126.2, 126.1, 122.4, 122.1, 121.2, 116.2, 109.2, 88.8, 80.9, 72.3, 50.9, 48.3, 38.1, 29.4, 29.2, 24.5, 24.4, 21.9; IR (KBr):  $\nu_{\text{max}}$  3445, 3056, 2929, 2862, 1745, 1482, 1276, 1125, 1068, 757  $\text{cm}^{-1}$ ; MS (EI):  $m/z$  ( $[\text{M}+\text{H}]^+$ ): 425; HRMS (EI):  $m/z$  calcd for  $\text{C}_{28}\text{H}_{28}\text{NO}_3$ : 425.11688; found: 425.12110.

**tert-Butyl 3,3,5a-trimethyl-2'-oxo-3,3a,4,5,5a,11b-hexahydrospiro[furo[2,3-a]xanthene-2,3'-indoline]-1'-carboxylate (3n):**

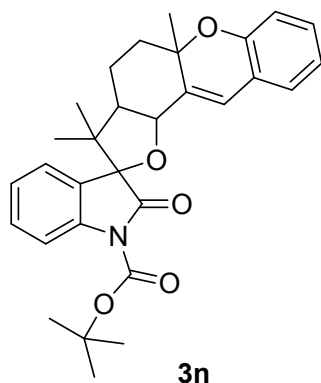

Colorless solid. m.p. 180-181 °C;  $^1\text{H}$  NMR (400 MHz,  $\text{CDCl}_3$ )  $\delta$  7.81 (t,  $J = 6.0$  Hz, 1H), 7.35 – 7.25 (m, 2H), 7.16 – 7.10 (m, 2H), 7.03 – 6.99 (m, 1H), 6.88 – 6.78 (m, 2H), 6.63 (s, 1H), 5.35 – 5.30 (m, 1H), 2.21 – 2.15 (m, 1H), 2.05 – 1.81 (m, 4H), 1.62 (s, 9H), 1.37 (s, 3H), 1.26 (s, 3H), 0.82 (s, 3H);  $^{13}\text{C}$  NMR (125 MHz,  $\text{CDCl}_3$ )  $\delta$  177.0, 152.9, 149.2, 139.9, 133.7, 129.6, 129.5, 127.6, 126.8, 126.3, 125.7, 123.8, 122.1, 121.2, 116.3, 114.9, 88.6, 84.1, 81.1, 51.0, 49.1, 38.0, 32.0, 29.7, 29.3, 28.2, 24.4, 23.9, 21.9; IR (KBr):  $\nu_{\text{max}}$  3421, 3059, 2925, 2856, 1721, 1475, 1259, 1176, 1113, 720  $\text{cm}^{-1}$ ; MS (EI):  $m/z$  ( $[\text{M}+1]^+$ ): 488; HRMS (EI):  $m/z$  calcd for  $\text{C}_{30}\text{H}_{34}\text{NO}_5$ : 488.08032; found: 488.08041.

**tert-Butyl 9-chloro-3,3,5a-trimethyl-2'-oxo-3,3a,4,5,5a,11b-hexahydrospiro[furo[2,3-a]xanthene-2,3'-indoline]-1'-carboxylate (3o):**

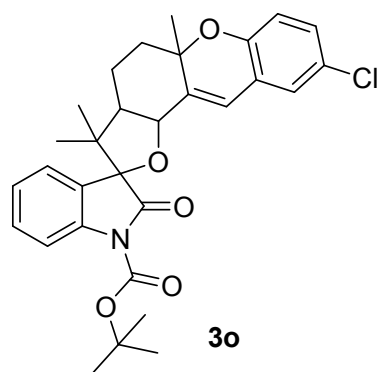

Colorless solid. m.p. 187-188 °C;  $^1\text{H}$  NMR (400 MHz,  $\text{CDCl}_3$ ):  $\delta$  7.82 (d,  $J = 8.1$  Hz, 1H), 7.33-7.30 (m, 2H), 7.14 (t,  $J = 7.5$  Hz, 1H), 7.09 – 7.04 (m, 1H), 6.99 – 6.96 (m, 1H), 6.73 (d,  $J = 8.6$ , 1H), 6.55 (s, 1H), 5.33 – 5.28 (m, 1H), 2.20 – 2.13 (m, 1H), 1.98 – 1.94 (m, 4H), 1.62 (s, 9H), 1.53 (s, 3H), 1.36 (s, 3H), 0.83 (s, 3H);  $^{13}\text{C}$  NMR (100 MHz,  $\text{CDCl}_3$ ):  $\delta$  176.9, 151.4, 149.1, 139.9, 135.2, 129.5, 129.2, 126.2, 125.8, 125.6, 125.2, 123.8, 117.5, 114.9, 88.5, 84.5, 84.1, 80.8, 77.7, 62.1, 50.9, 49.1, 37.9, 29.7, 29.2, 28.1, 24.3, 23.9, 22.7, 21.8, 14.1; IR (KBr):  $\nu_{\text{max}}$  3426, 2853, 1714, 1612, 1495, 1460, 1245, 1176, 1113, 770, 699  $\text{cm}^{-1}$ ; MS (EI):  $m/z$  ( $[\text{M}+\text{H}]^+$ ): 522; HRMS (EI):  $m/z$  calcd for  $\text{C}_{30}\text{H}_{33}\text{ClNO}_5$ : 522.19690; found: 522.19723.

**tert-Butyl 9-bromo-3,3,5a-trimethyl-2'-oxo-3,3a,4,5,5a,11b-hexahydrospiro[furo[2,3-a]xanthene-2,3'-indoline]-1'-carboxylate (3p):**

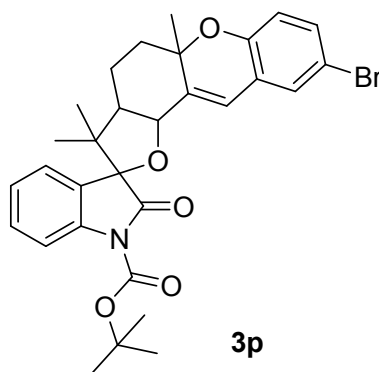

Colorless solid. m.p. 179-180 °C;  $^1\text{H}$  NMR (500 MHz,  $\text{CDCl}_3$ ):  $\delta$  7.82 (d,  $J = 8.1$  Hz, 1H), 7.33-7.28 (m, 2H), 7.23 – 7.18 (m, 1H), 7.16 – 7.12 (m, 1H), 7.12 – 7.10 (m, 1H), 6.71 – 6.66 (m, 1H), 6.54 (s, 1H), 5.34 – 5.27 (m, 1H), 2.20 – 2.14 (m, 1H), 2.01 – 1.83 (m, 4H), 1.62 (s, 9H), 1.53 (s, 3H), 1.36 (s, 3H), 0.83 (s, 3H);  $^{13}\text{C}$  NMR (125 MHz,  $\text{CDCl}_3$ ):  $\delta$  177.1, 152.5, 149.1, 139.8, 133.7, 129.7, 127.6, 126.3, 125.7, 123.8, 122.0, 121.1, 116.2, 114.8, 114.8, 88.5, 84.0, 81.1, 51.0, 49.1, 38.0, 29.7, 29.2, 28.1, 24.4, 23.9, 22.7, 21.9, 14.1; IR (KBr):  $\nu_{\text{max}}$

3428, 2830, 1874, 1623, 1564, 1474, 1228, 1133, 1021, 789  $\text{cm}^{-1}$ ; MS (EI):  $m/z$  ( $[\text{M}+\text{H}]^+$ ): 566; HRMS (EI):  $m/z$  calcd for  $\text{C}_{30}\text{H}_{33}\text{BrNO}_5$ : 566.15366; found: 566.15608.

**5'-Methoxy-1',3,3,5a-tetramethyl-3a,5,5a,11b-tetrahydro-3H,4H-spiro[furo[2,3-a]xanthene-2,3'-indolin]-2'-one (5q):**

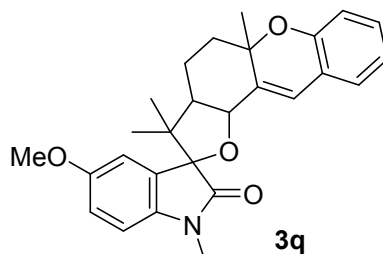

Colorless solid. m.p: 214-215  $^{\circ}\text{C}$ ;  $^1\text{H}$  NMR (500 MHz,  $\text{CDCl}_3$ )  $\delta$  7.12 (t,  $J = 7.8, 1.6$  Hz, 1H), 7.00 (dd,  $J = 7.4, 1.5$  Hz, 1H), 6.93 (d,  $J = 2.5$  Hz, 1H), 6.84 (dd,  $J = 7.4, 6.6$  Hz, 1H), 6.81 – 6.75 (m, 2H), 6.67 – 6.58 (m, 2H), 5.35 (d,  $J = 3.4$  Hz, 1H), 3.79 (s, 3H), 3.07 (s, 3H), 2.22 – 2.13 (m, 1H), 2.05 – 1.83 (m, 4H), 1.52 (s, 3H), 1.38 (s, 3H), 0.90 (s, 3H);  $^{13}\text{C}$  NMR (101 MHz,  $\text{CDCl}_3$ )  $\delta$  178.6, 155.3, 152.9, 138.1, 133.9, 130.2, 129.4, 126.7, 126.0, 122.1, 121.1, 116.2, 114.7, 112.5, 108.2, 88.9, 80.7, 55.8, 50.8, 48.0, 38.0, 29.4, 26.3, 24.4, 21.9; IR (KBr):  $\nu_{\text{max}}$  3425, 2926, 2857, 1687, 1488, 1456, 1264, 1127, 1029, 743  $\text{cm}^{-1}$ ; MS (EI):  $m/z$  ( $[\text{M}+\text{H}]^+$ ): 432; HRMS (EI):  $m/z$  calcd  $\text{C}_{26}\text{H}_{28}\text{NO}_3$ : 432.20636; found: 432.20805.

#### 4. Copies of $^1\text{H}$ and $^{13}\text{C}$ NMR spectra of products

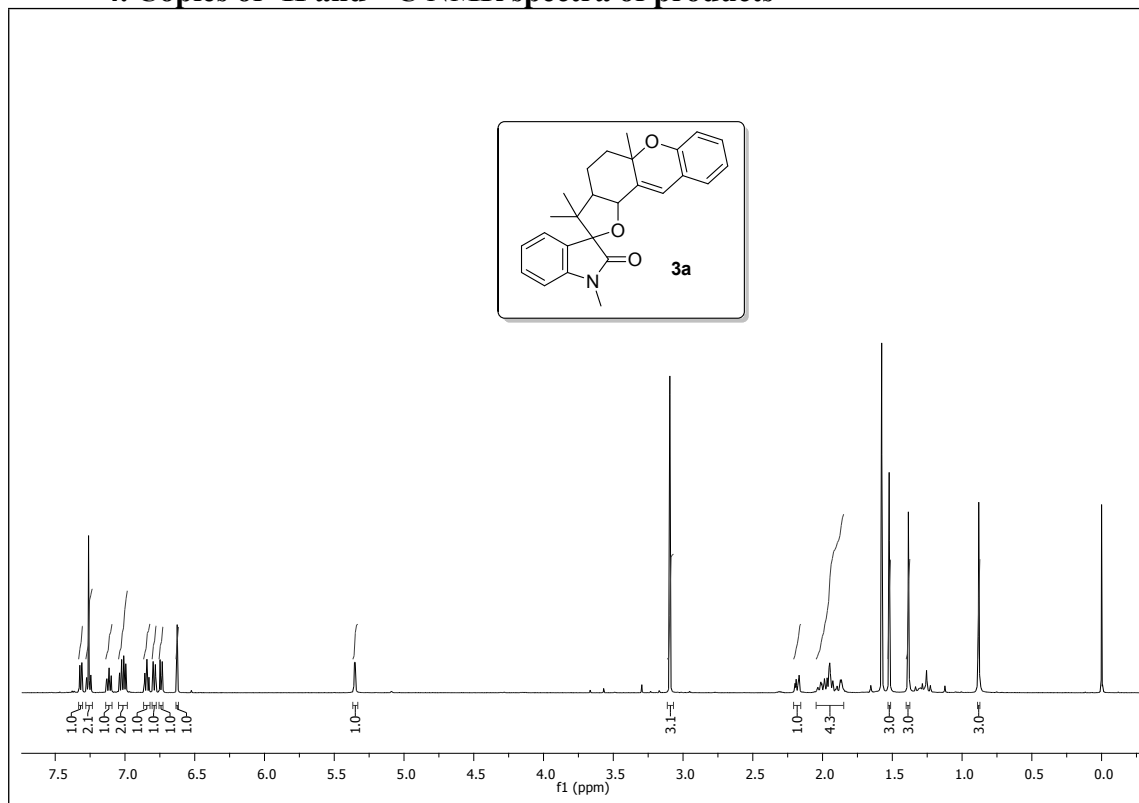

$^1\text{H}$  NMR (500 MHz,  $\text{CDCl}_3$ ) spectrum of compound 3a

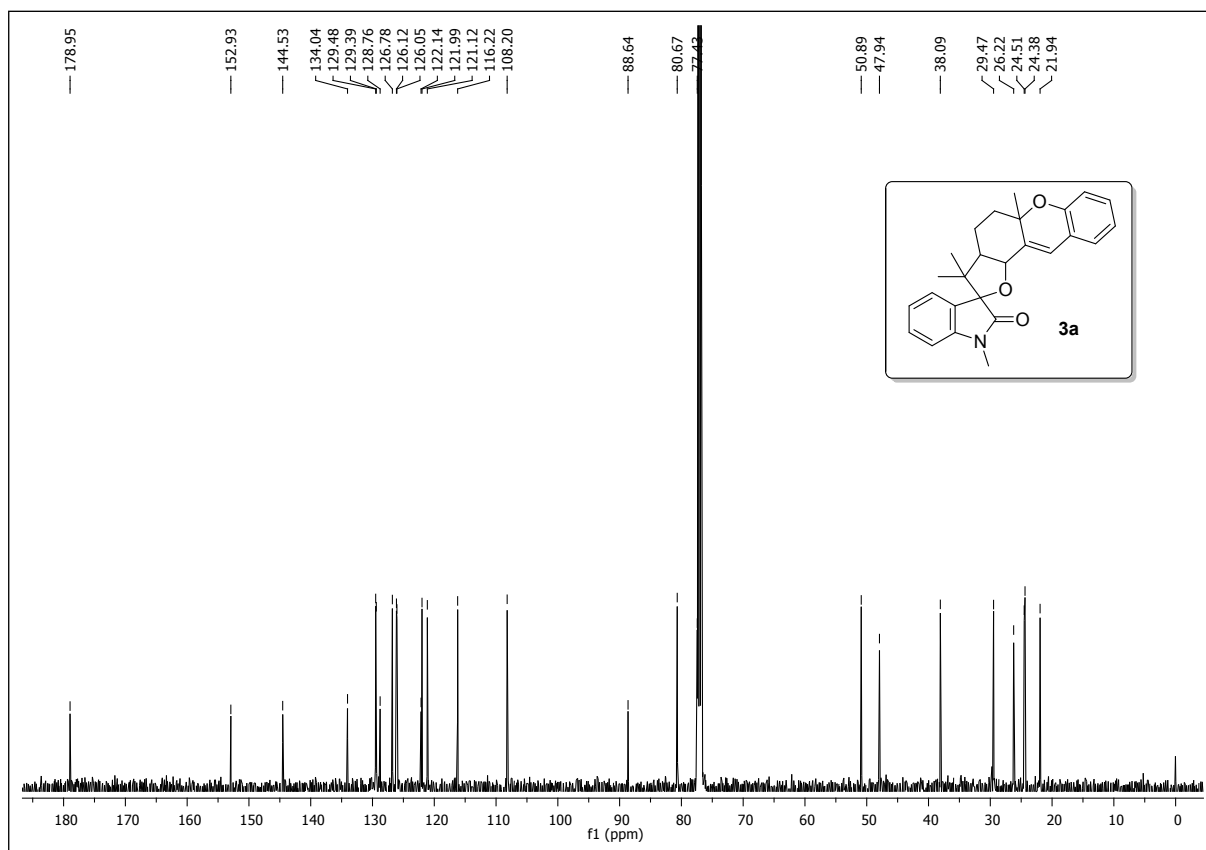

$^{13}\text{C}$  NMR (125 MHz,  $\text{CDCl}_3$ ) spectrum of compound 3a

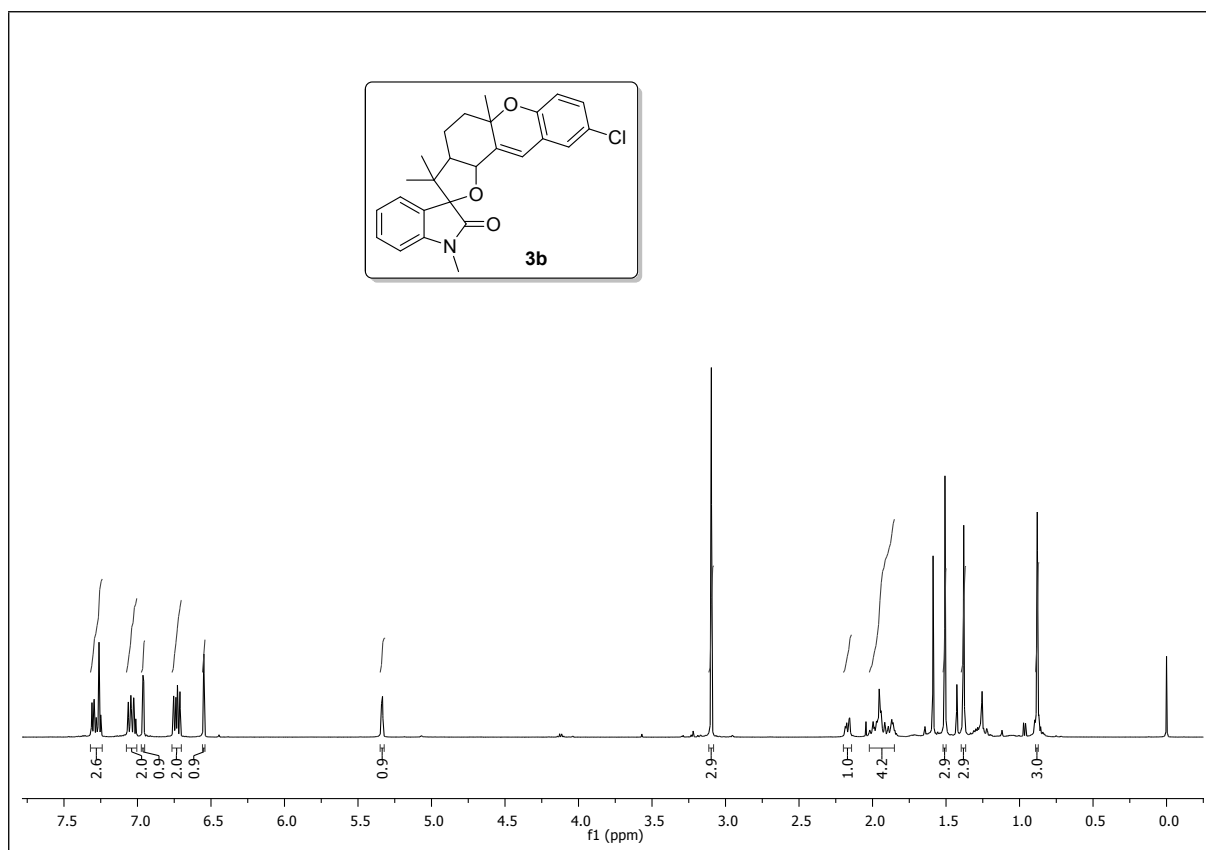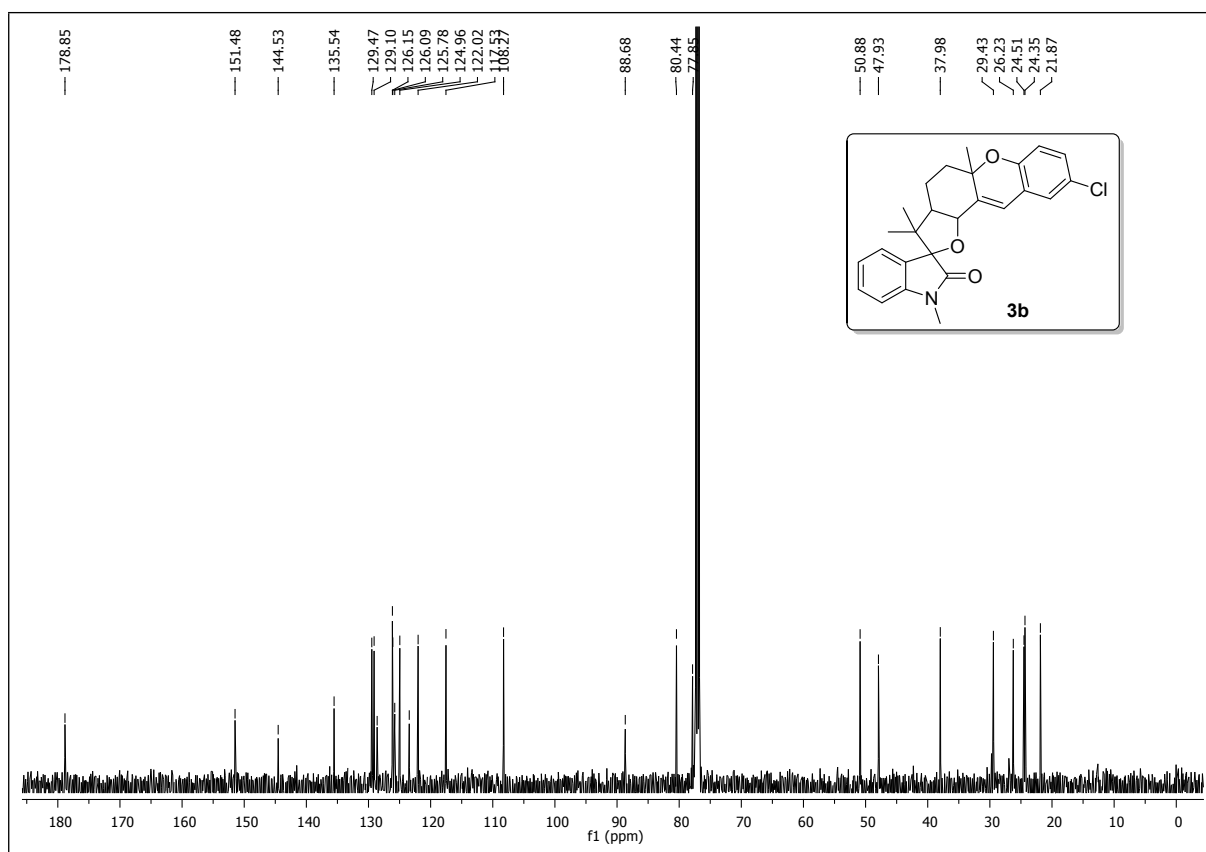



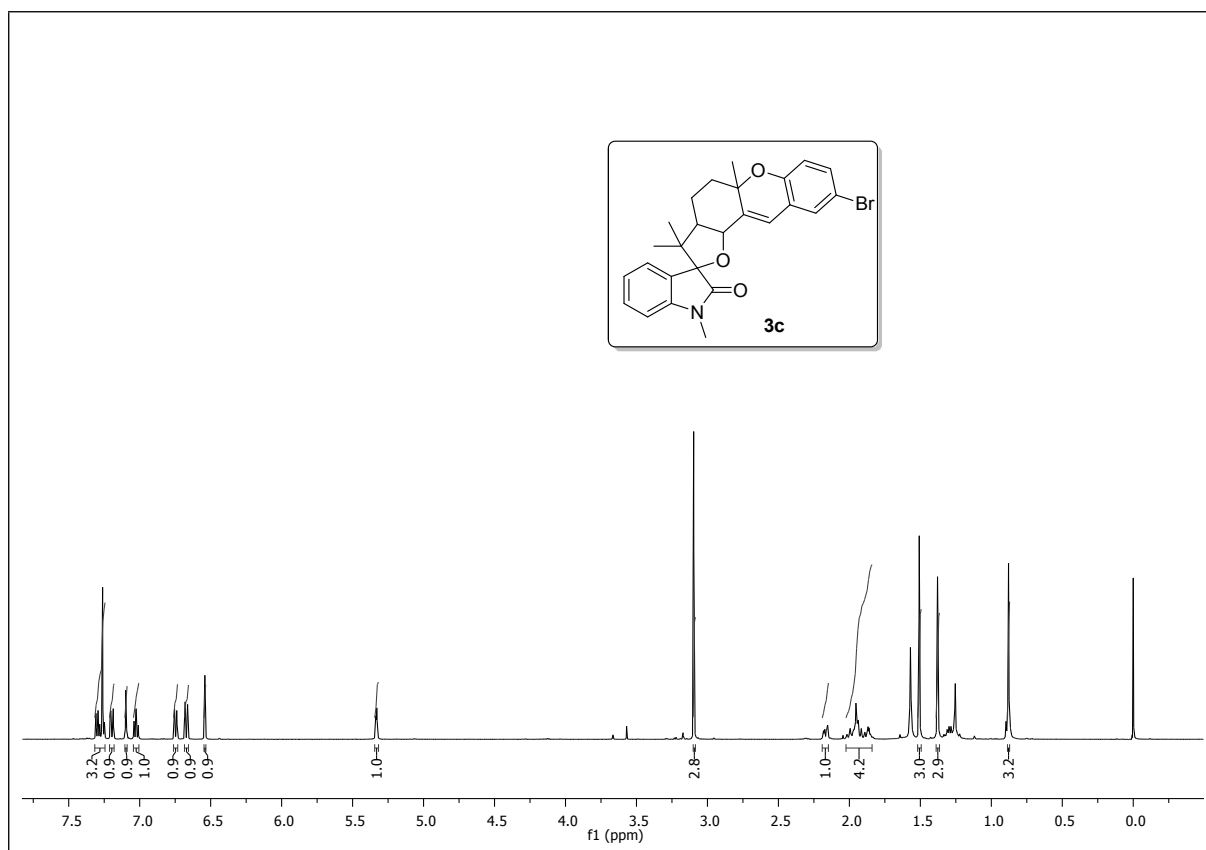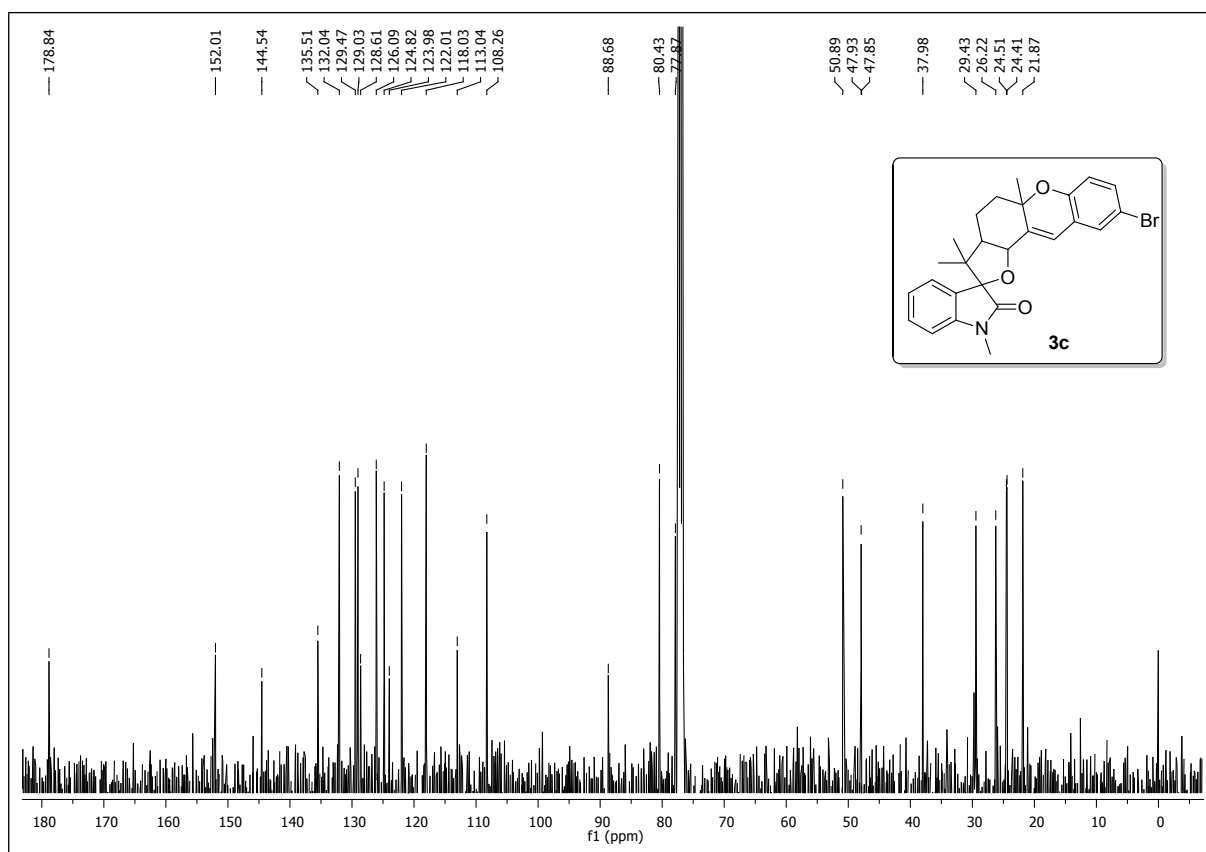

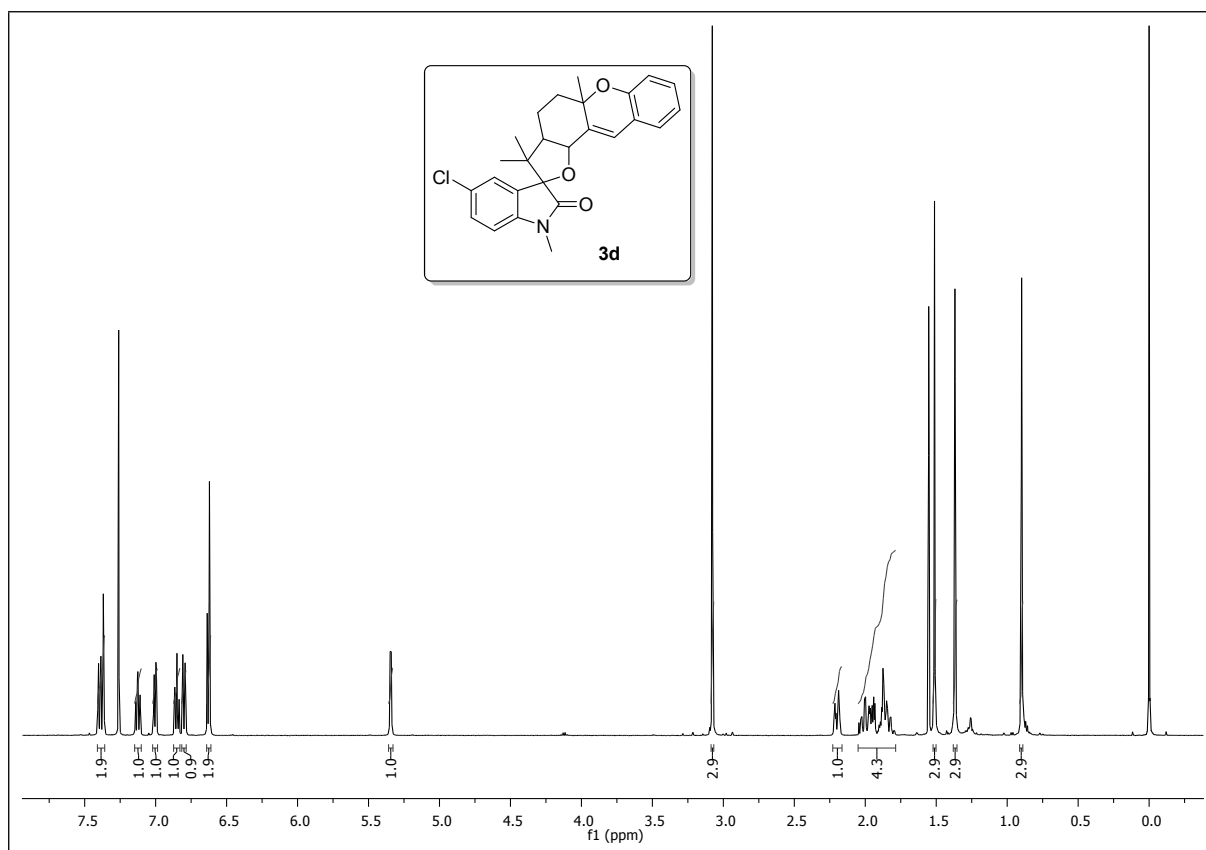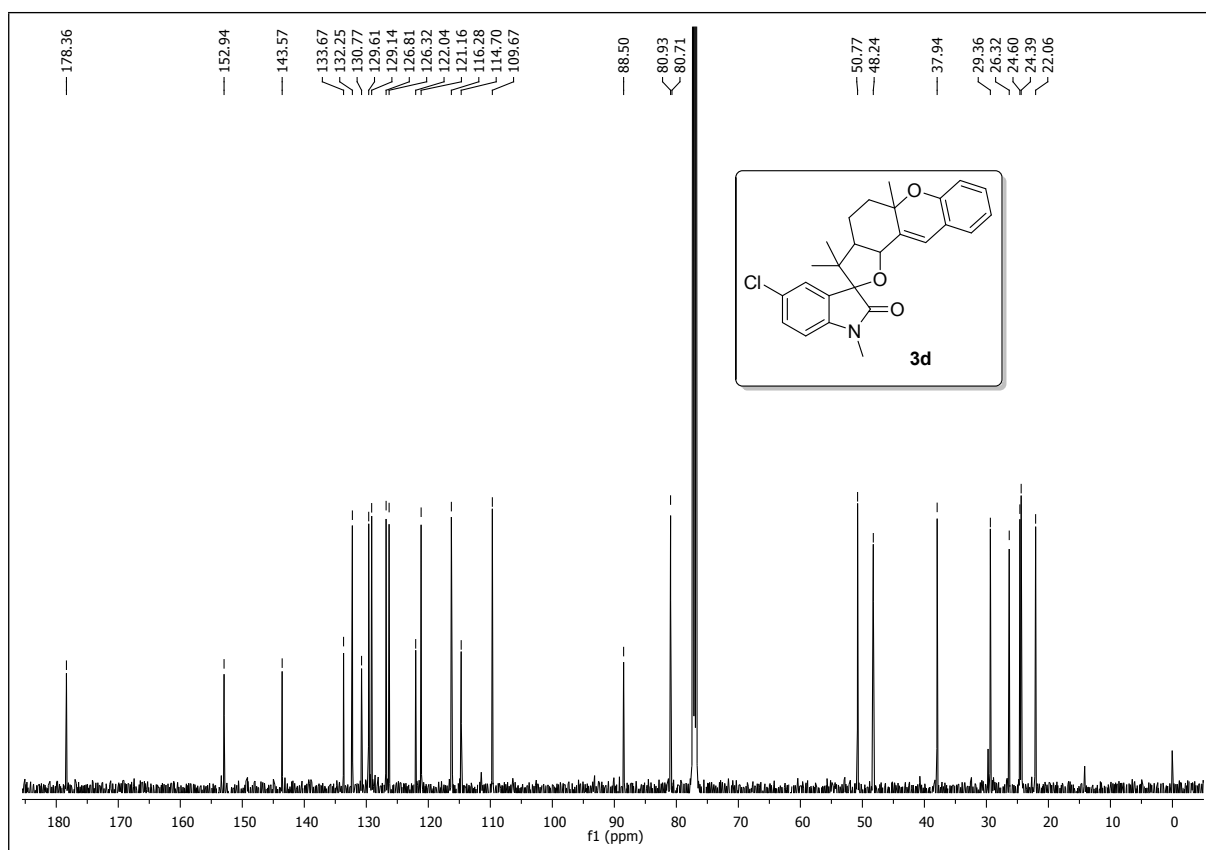

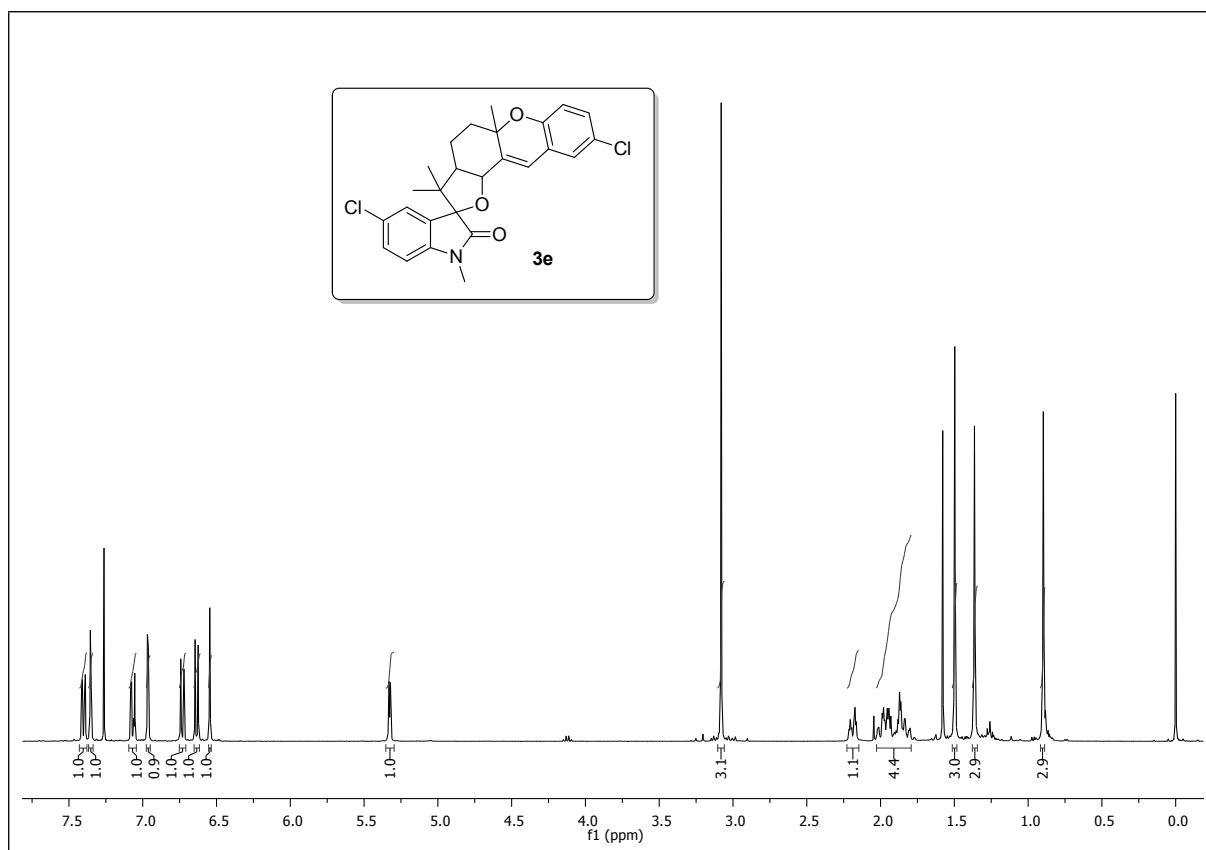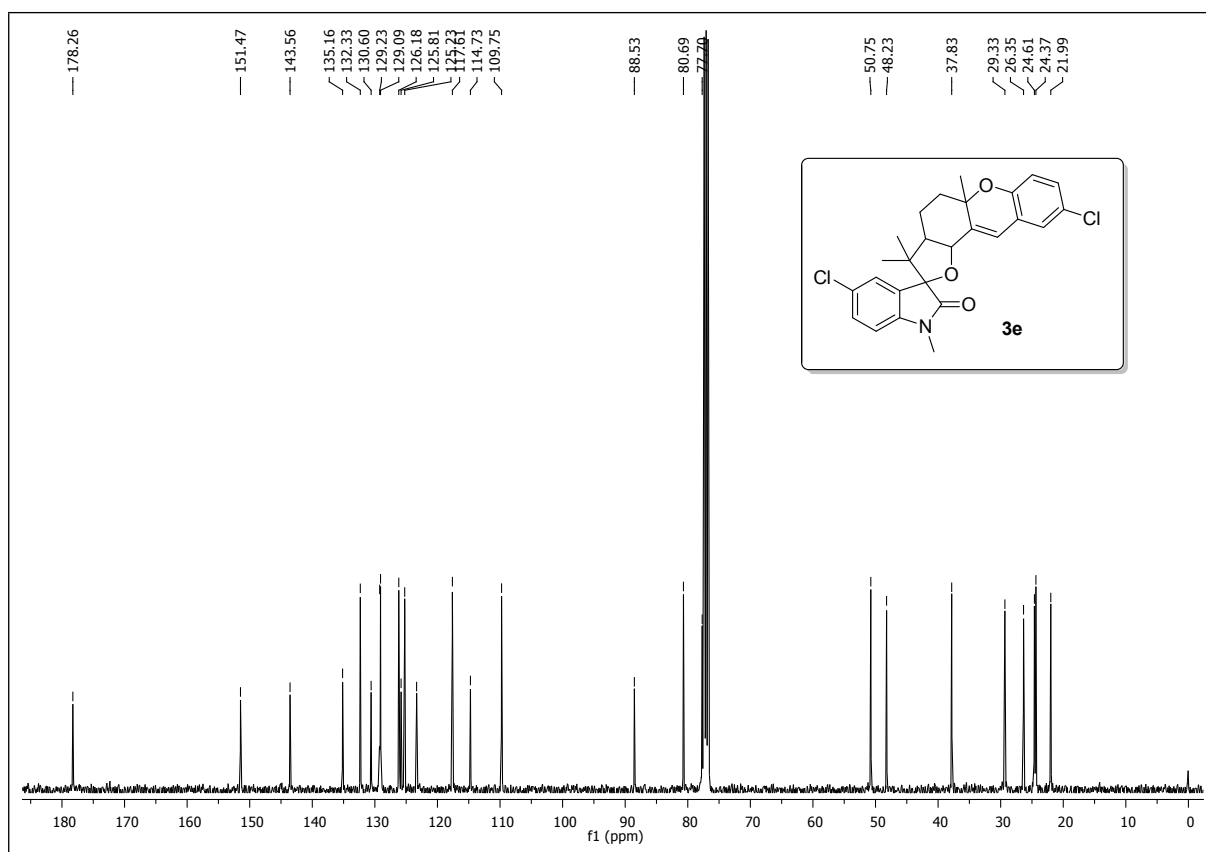

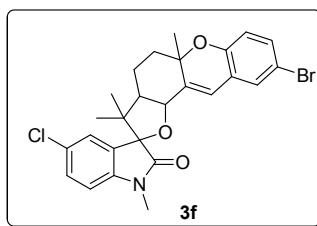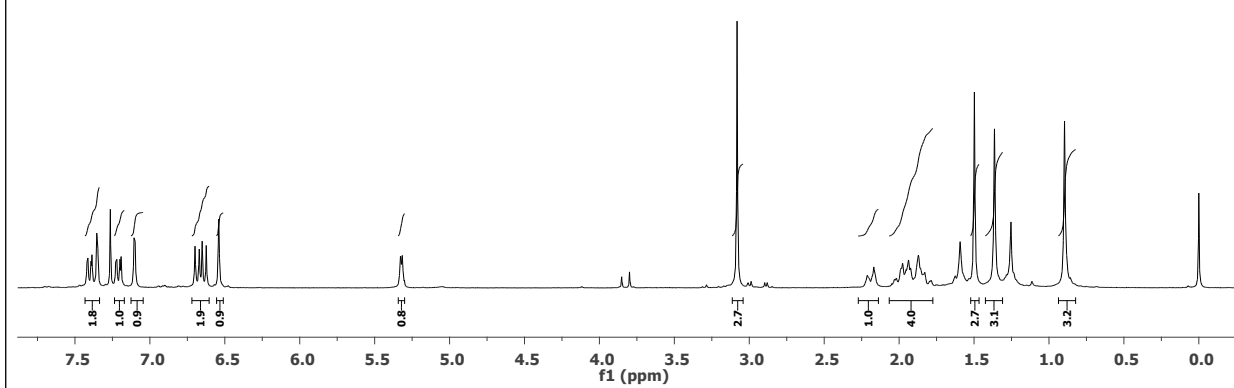

**<sup>1</sup>H NMR (300 MHz, CDCl<sub>3</sub>) spectrum of compound 3f**

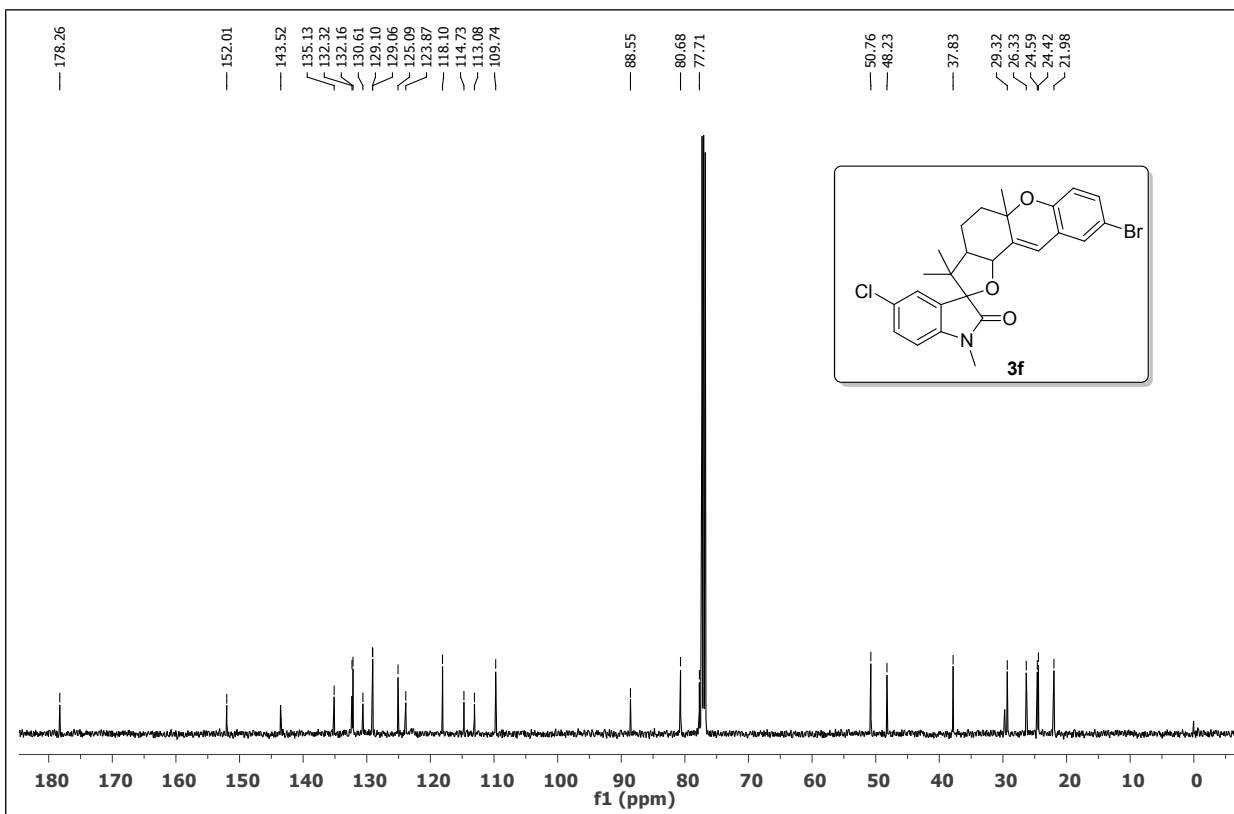

**<sup>13</sup>C NMR (100 MHz, CDCl<sub>3</sub>) spectrum of compound 3f**

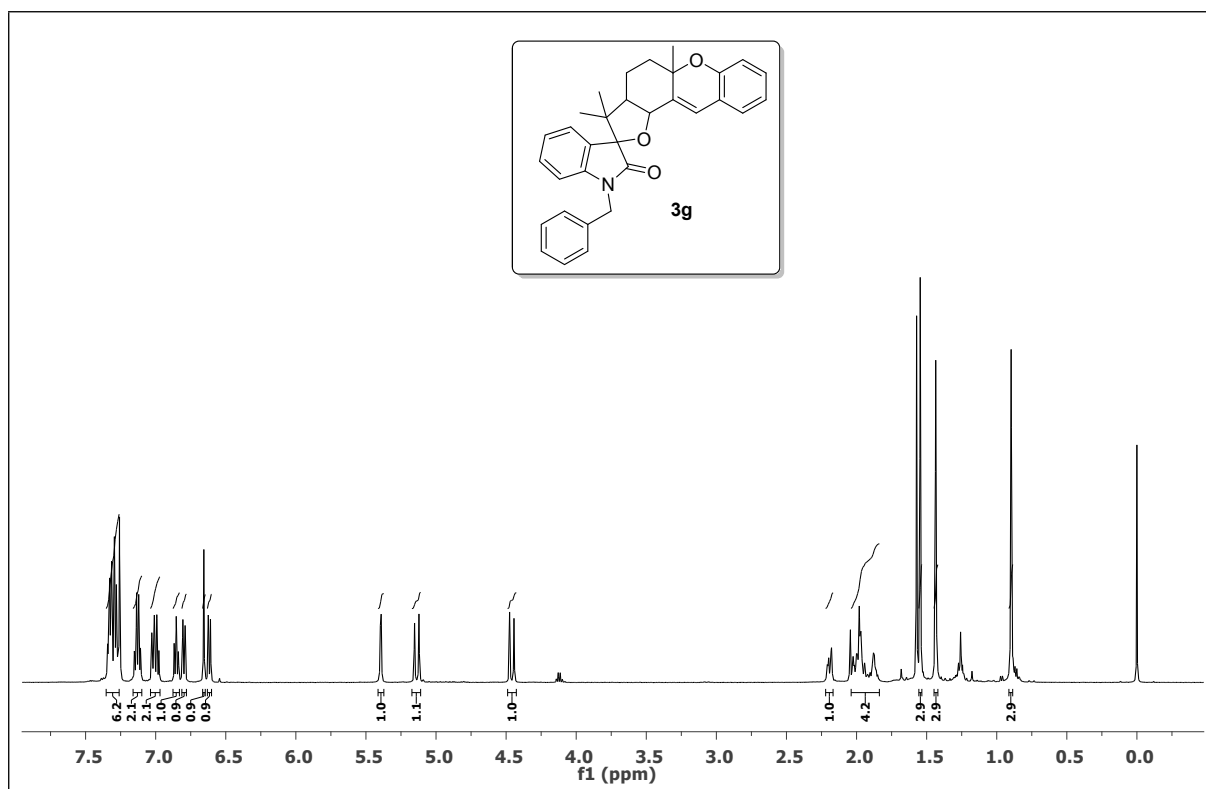

<sup>1</sup>H NMR (500 MHz, CDCl<sub>3</sub>) spectrum of compound **3g**

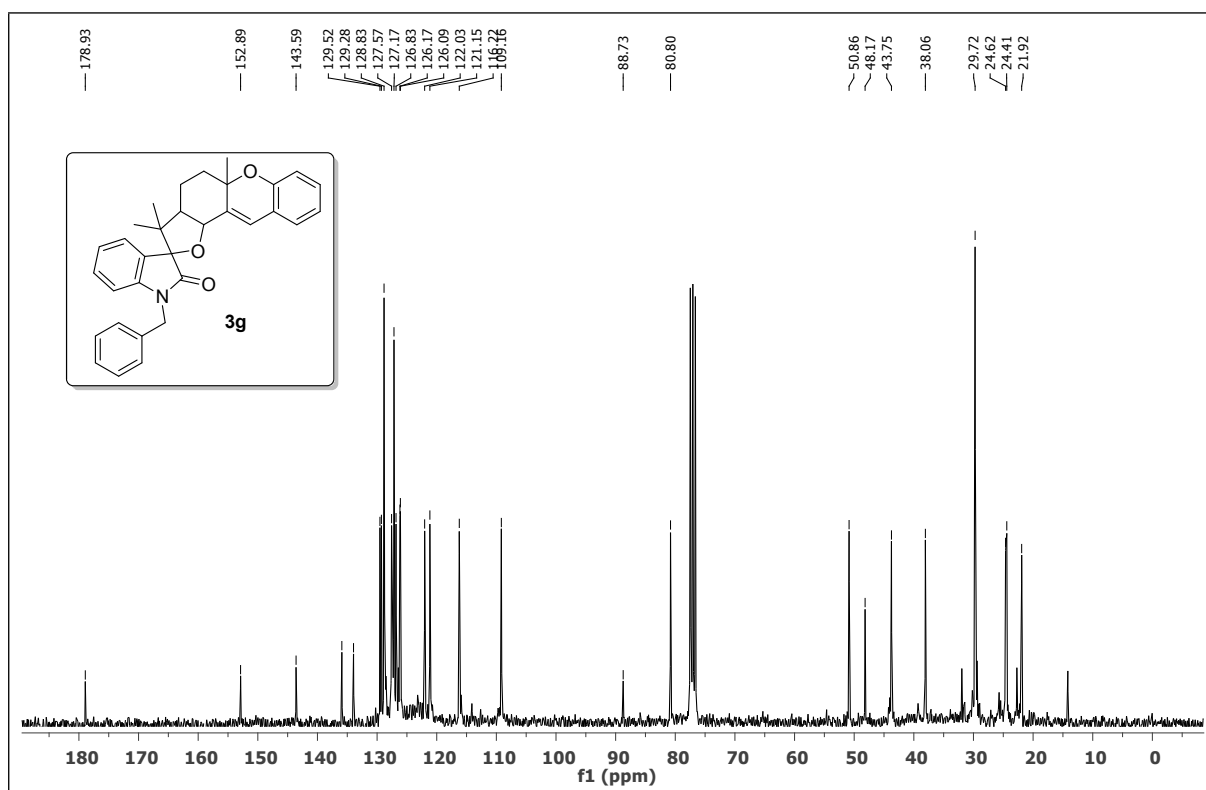

<sup>13</sup>C NMR (75 MHz, CDCl<sub>3</sub>) spectrum of compound **3g**

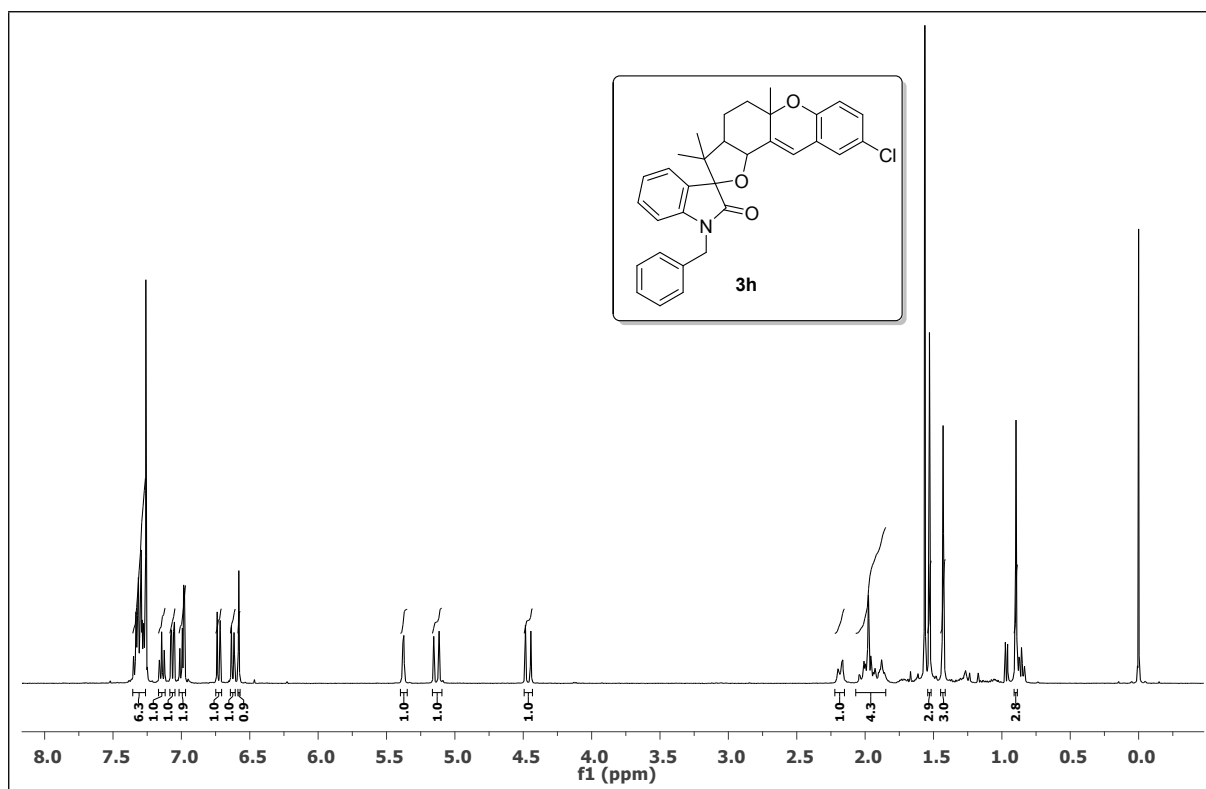

<sup>1</sup>H NMR (400 MHz, CDCl<sub>3</sub>) spectrum of compound 3h

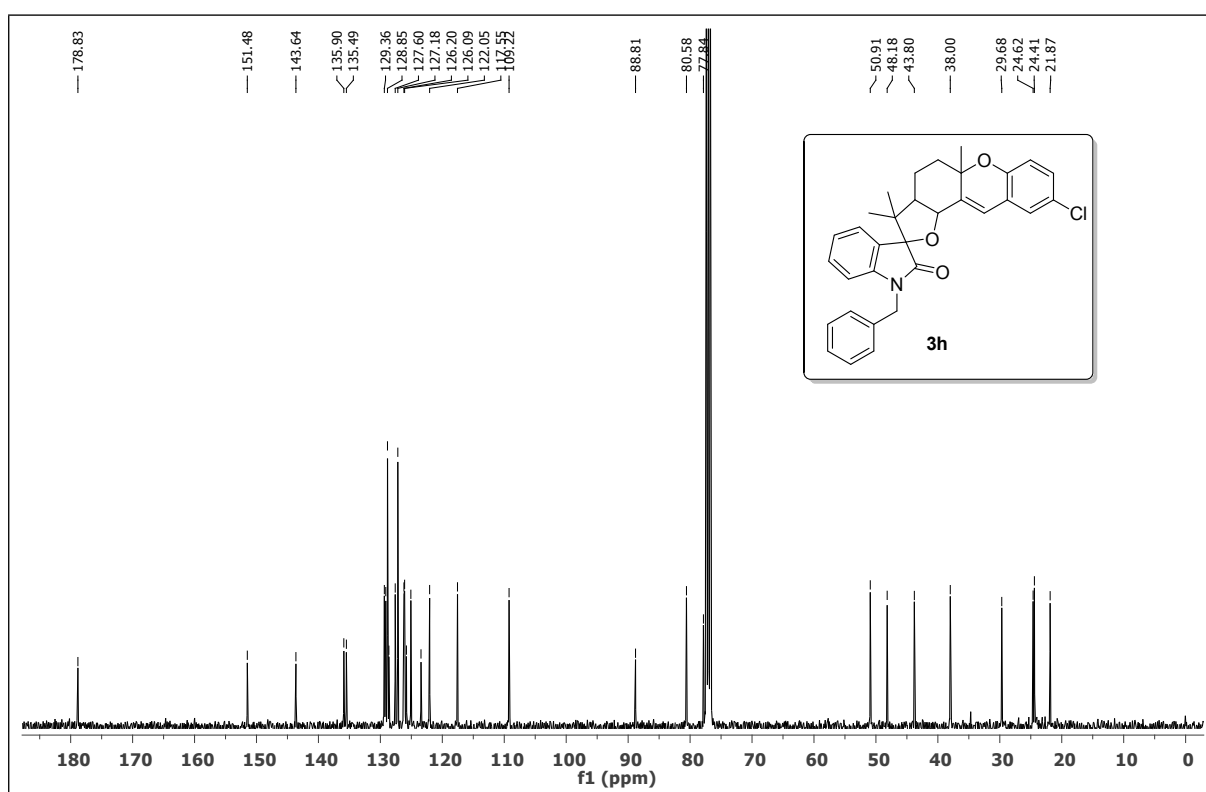

<sup>13</sup>C NMR (100 MHz, CDCl<sub>3</sub>) spectrum of compound 3h

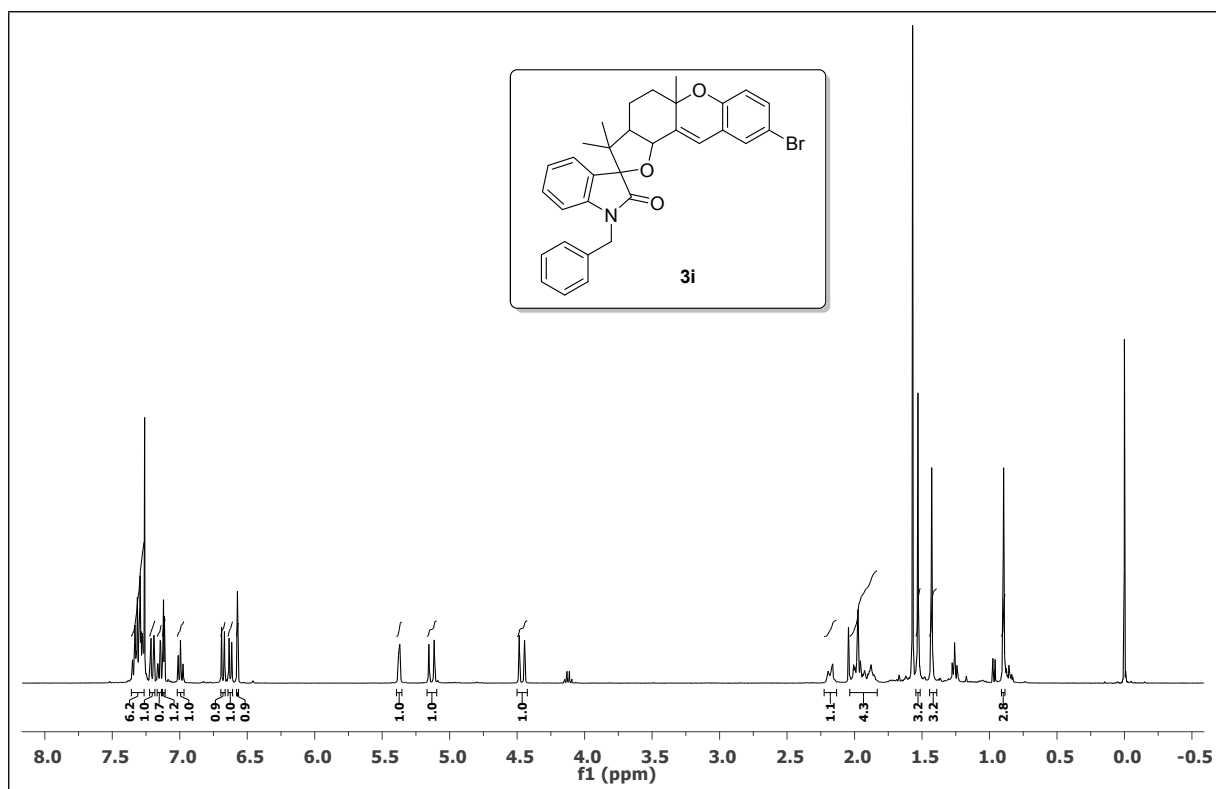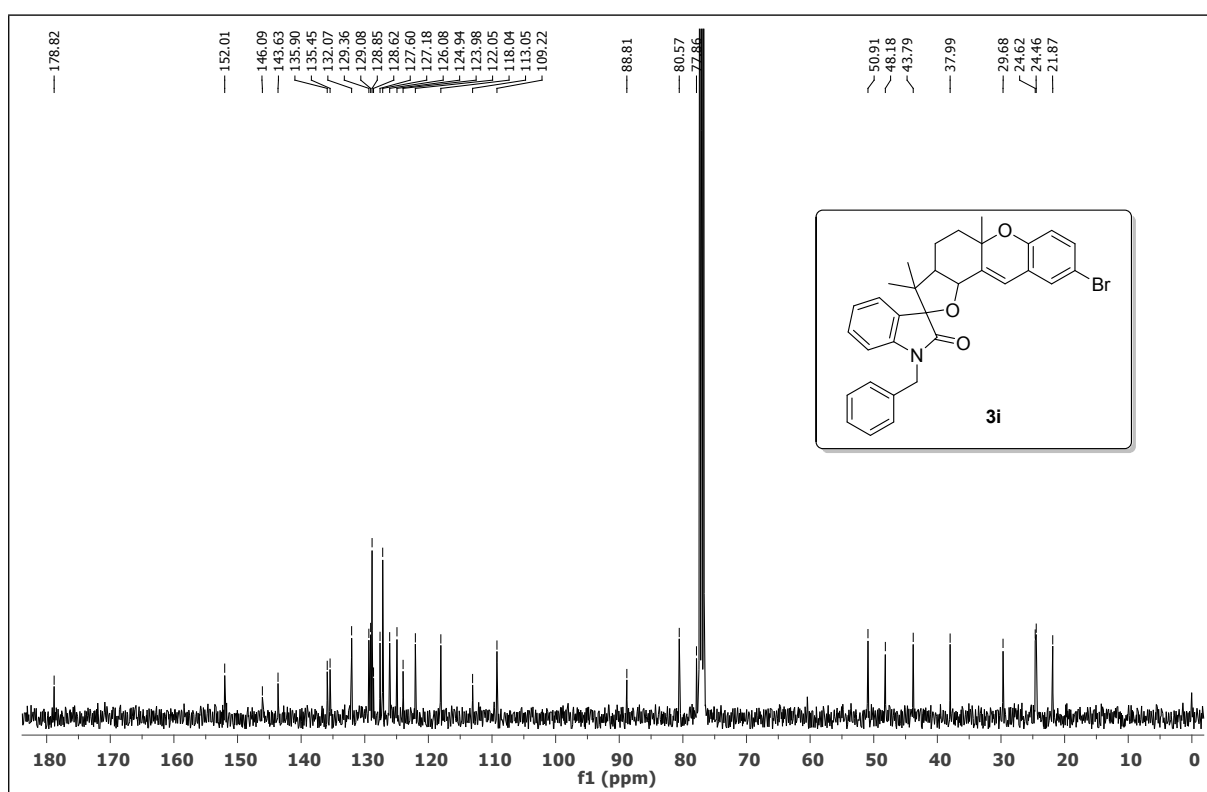

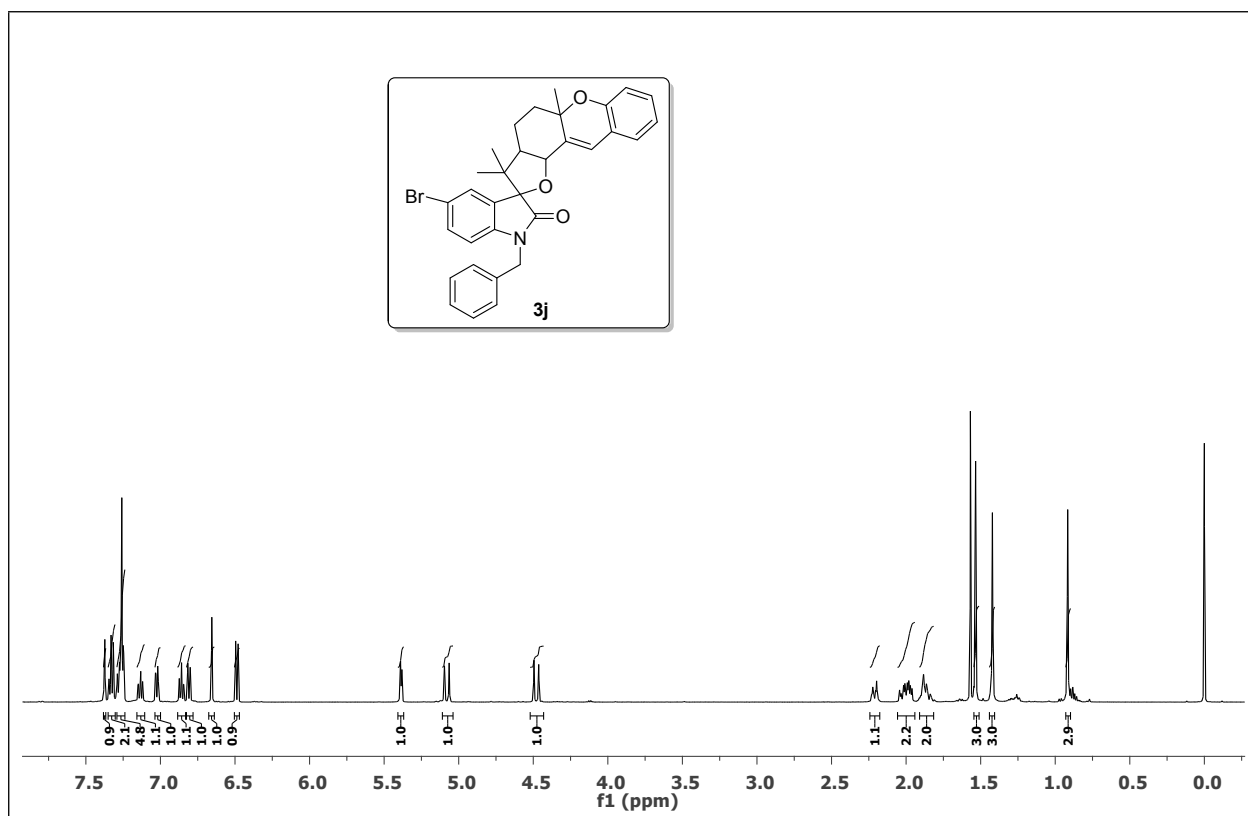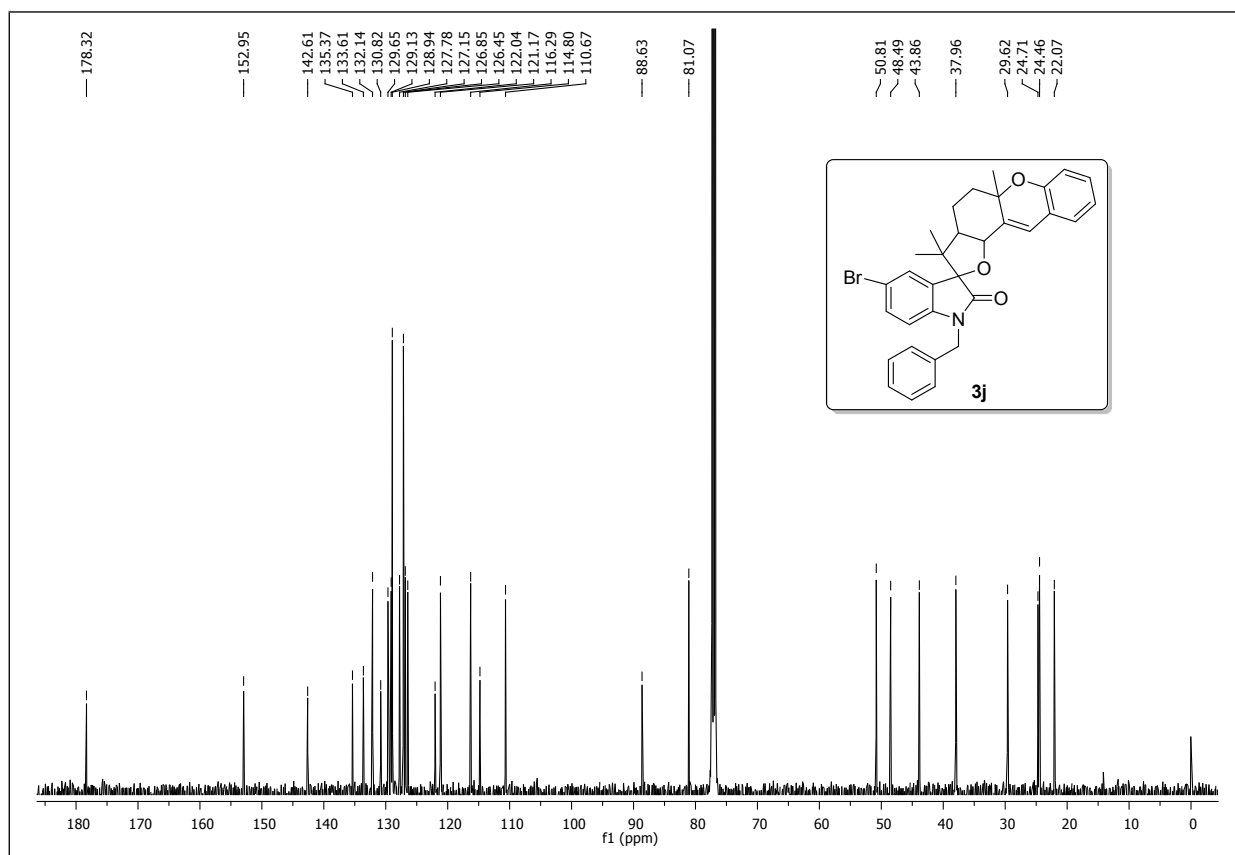



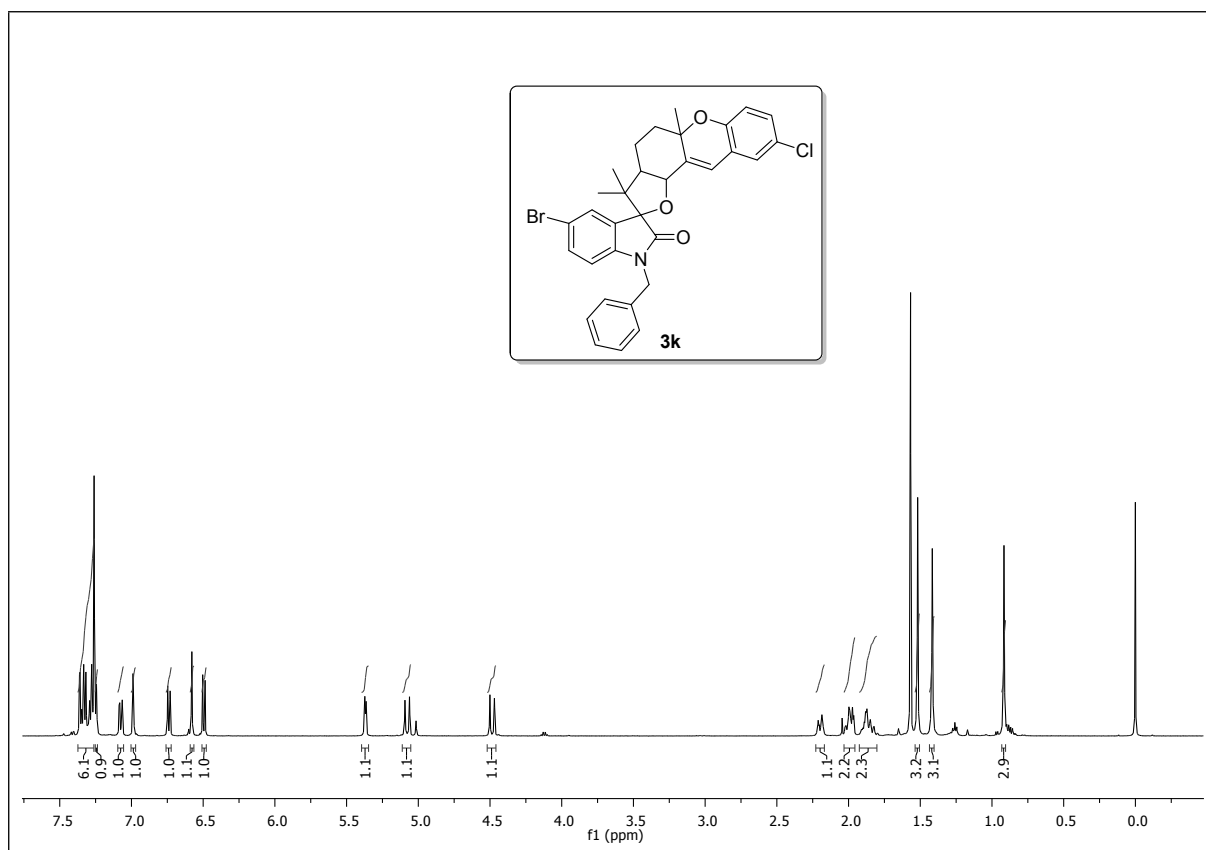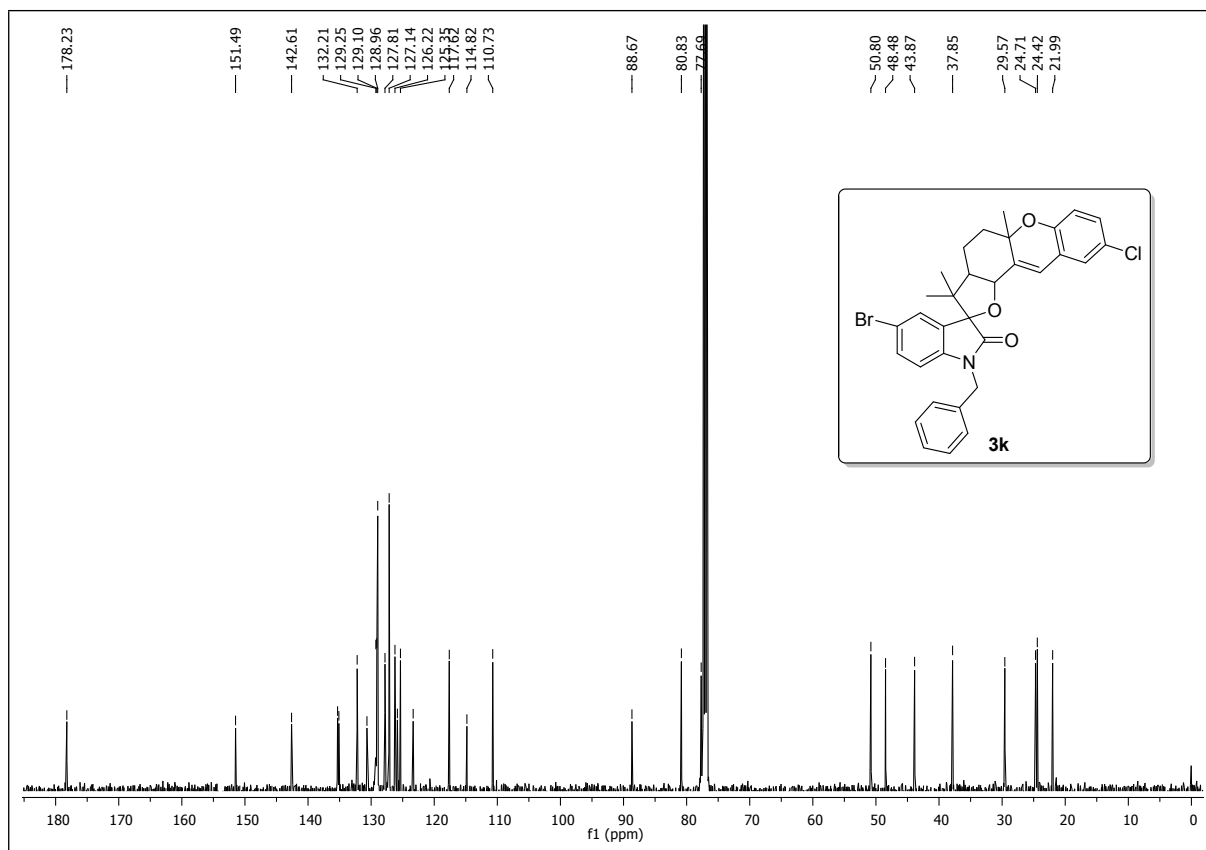

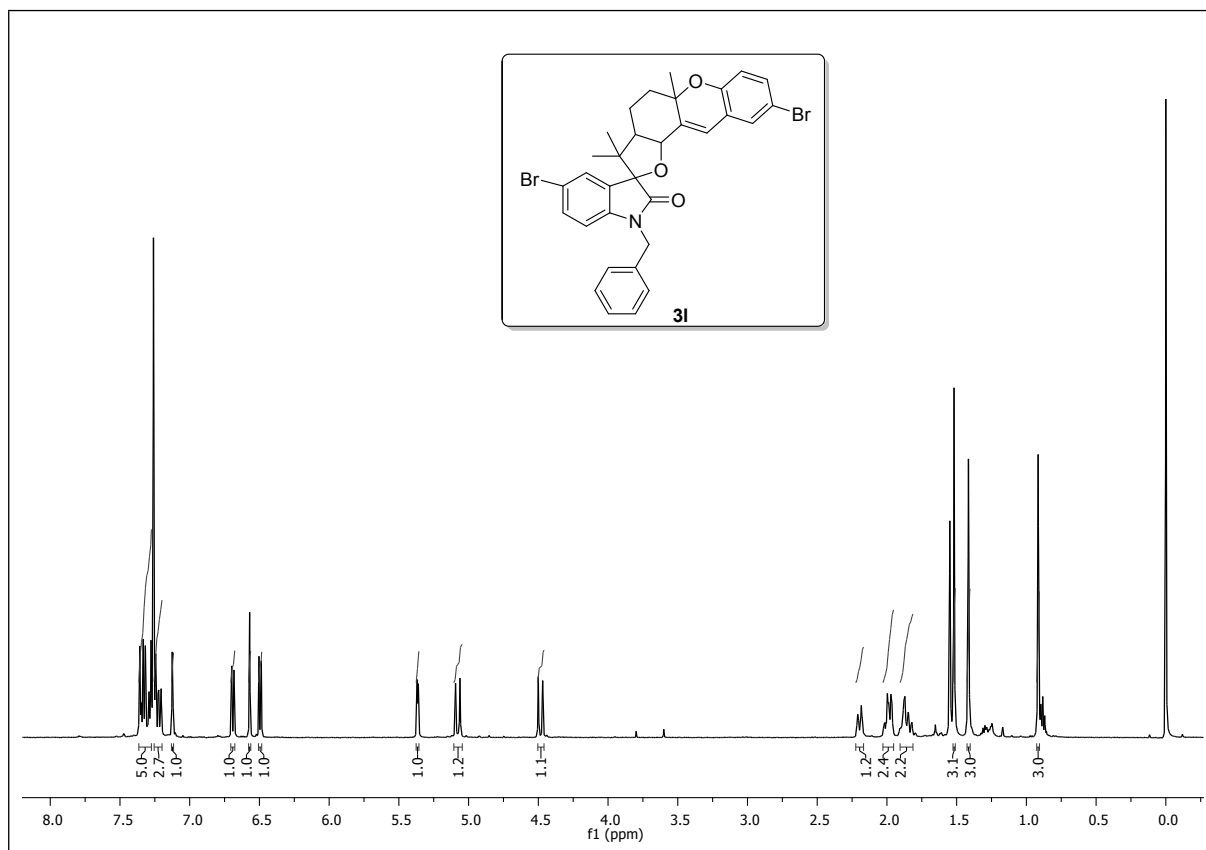

<sup>1</sup>H NMR (500 MHz, CDCl<sub>3</sub>) spectrum of compound **31**

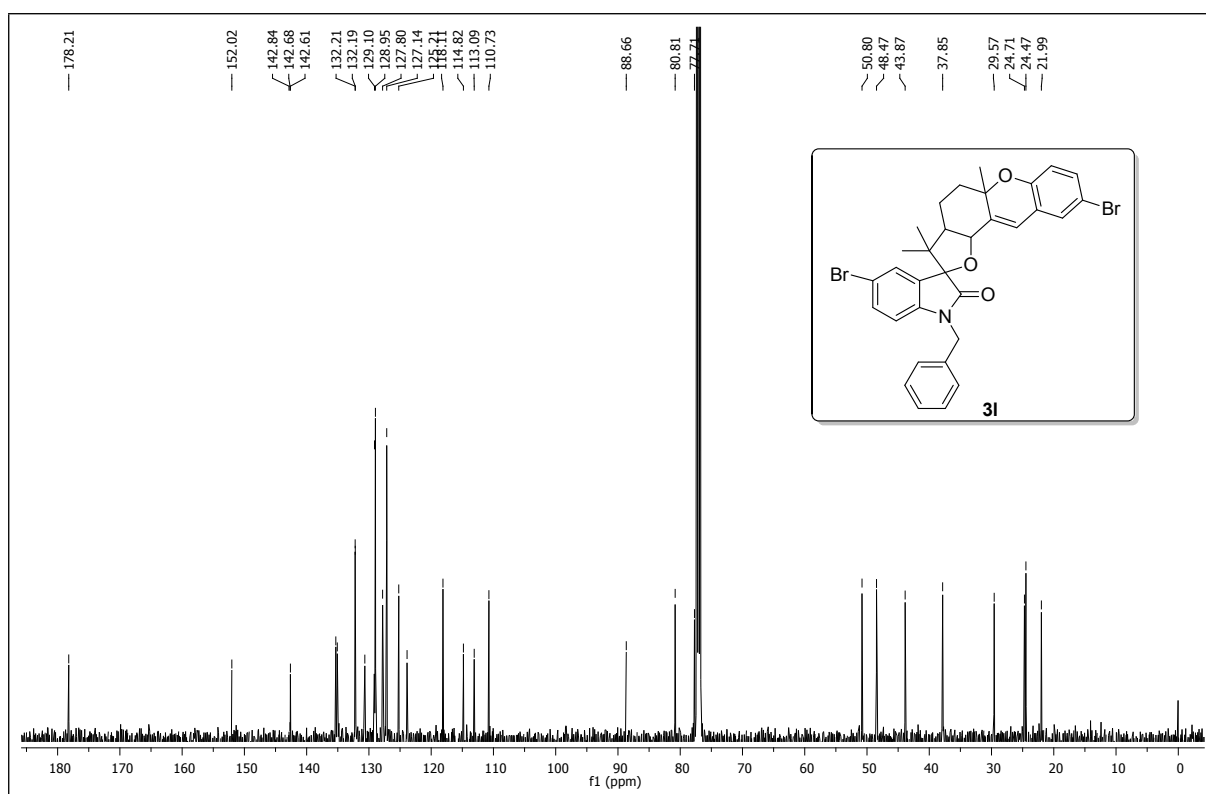

<sup>13</sup>C NMR (125 MHz, CDCl<sub>3</sub>) spectrum of compound **31**

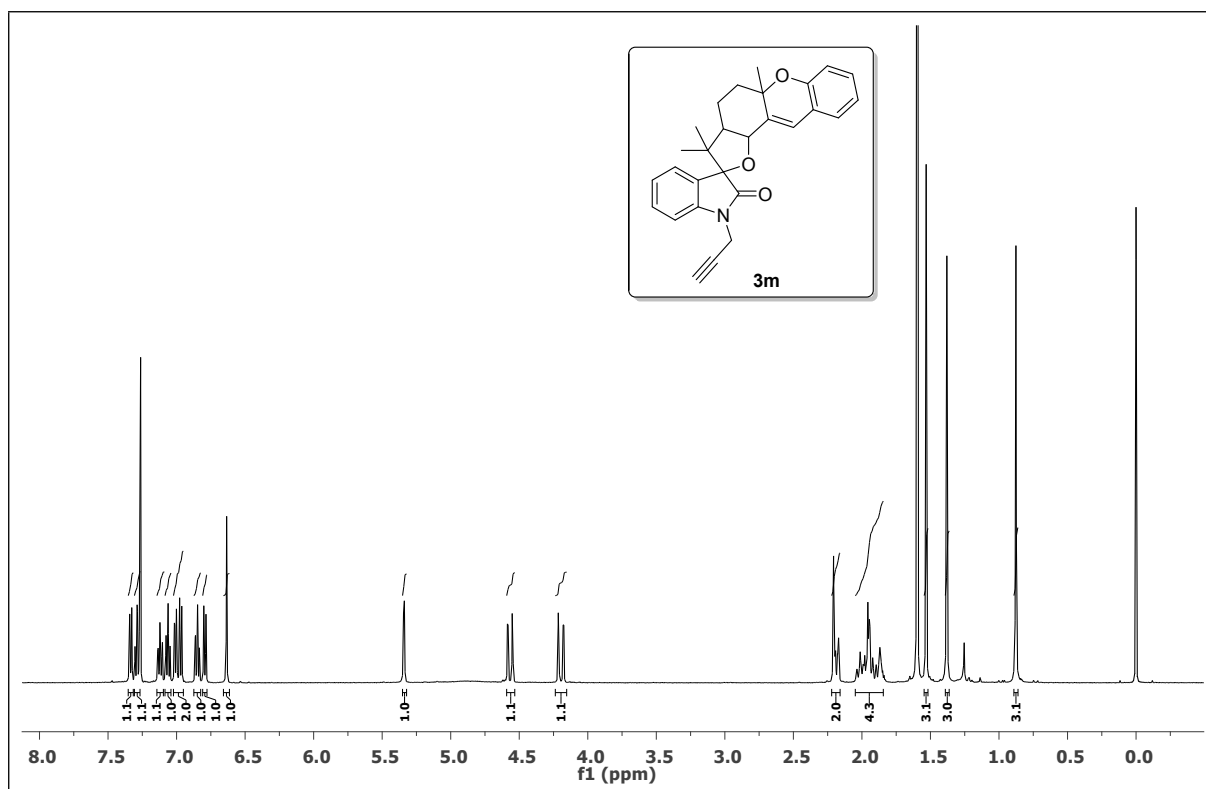

**<sup>1</sup>H NMR (500 MHz, CDCl<sub>3</sub>) spectrum of compound 3m**

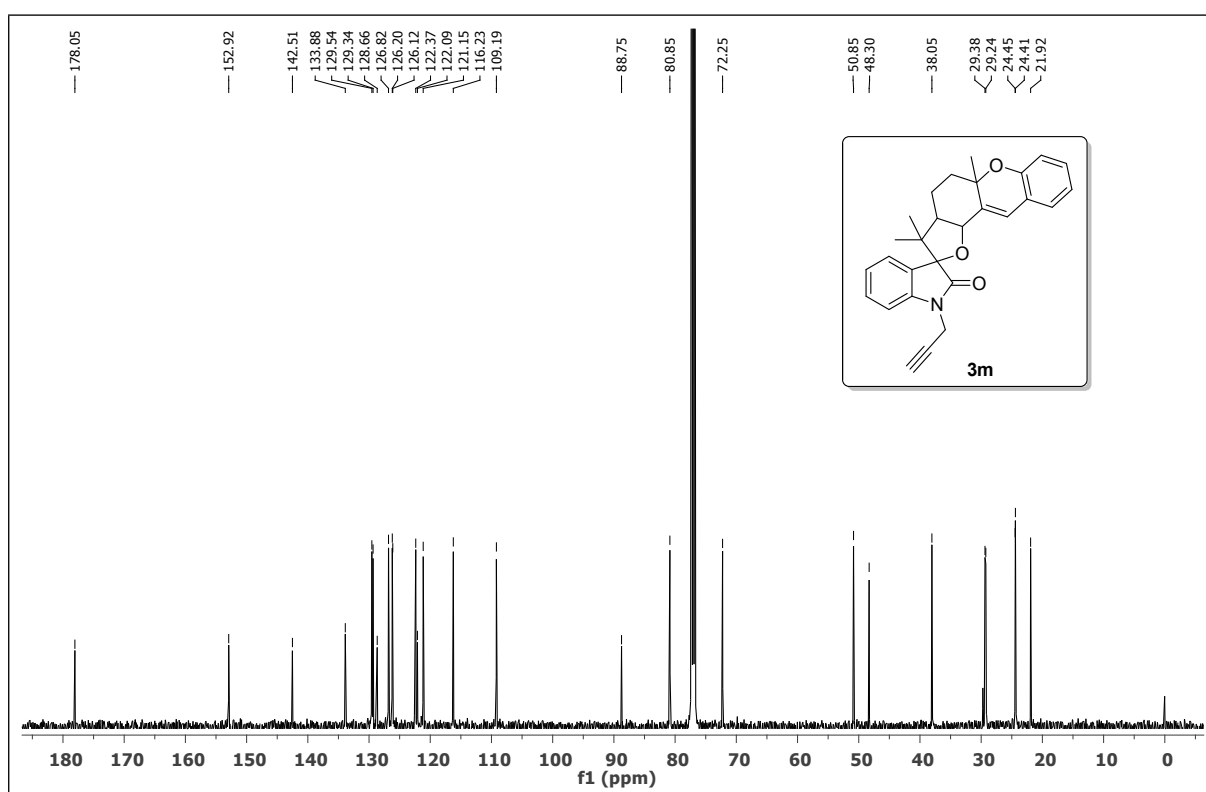

**<sup>13</sup>C NMR (125 MHz, CDCl<sub>3</sub>) spectrum of compound 3m**

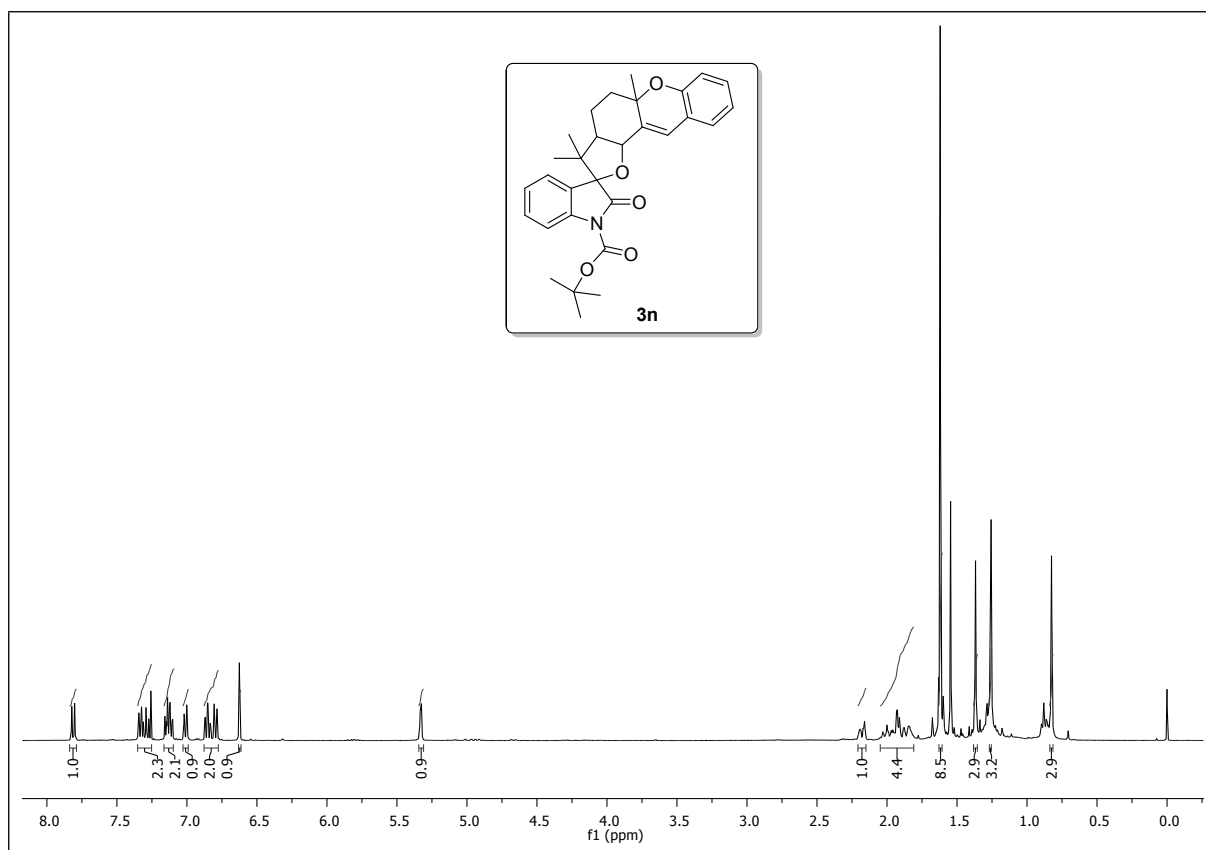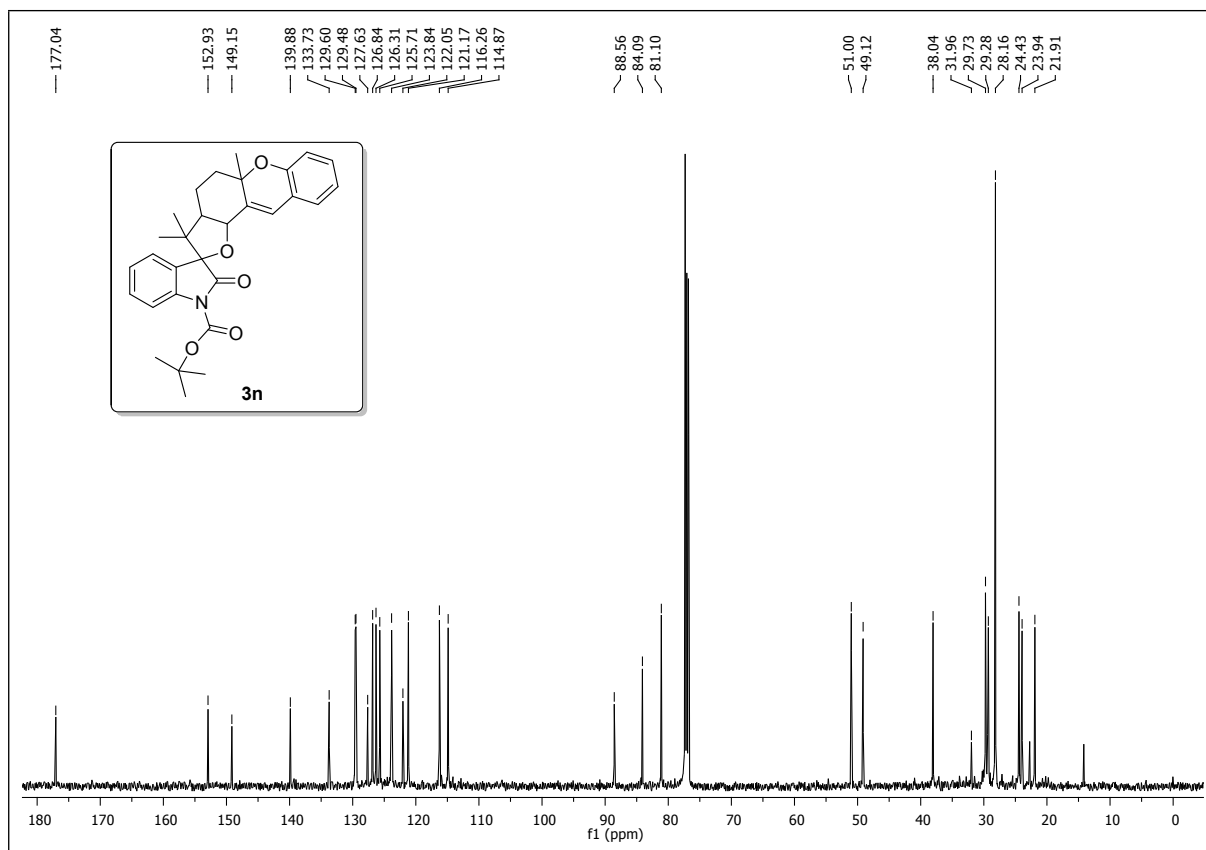

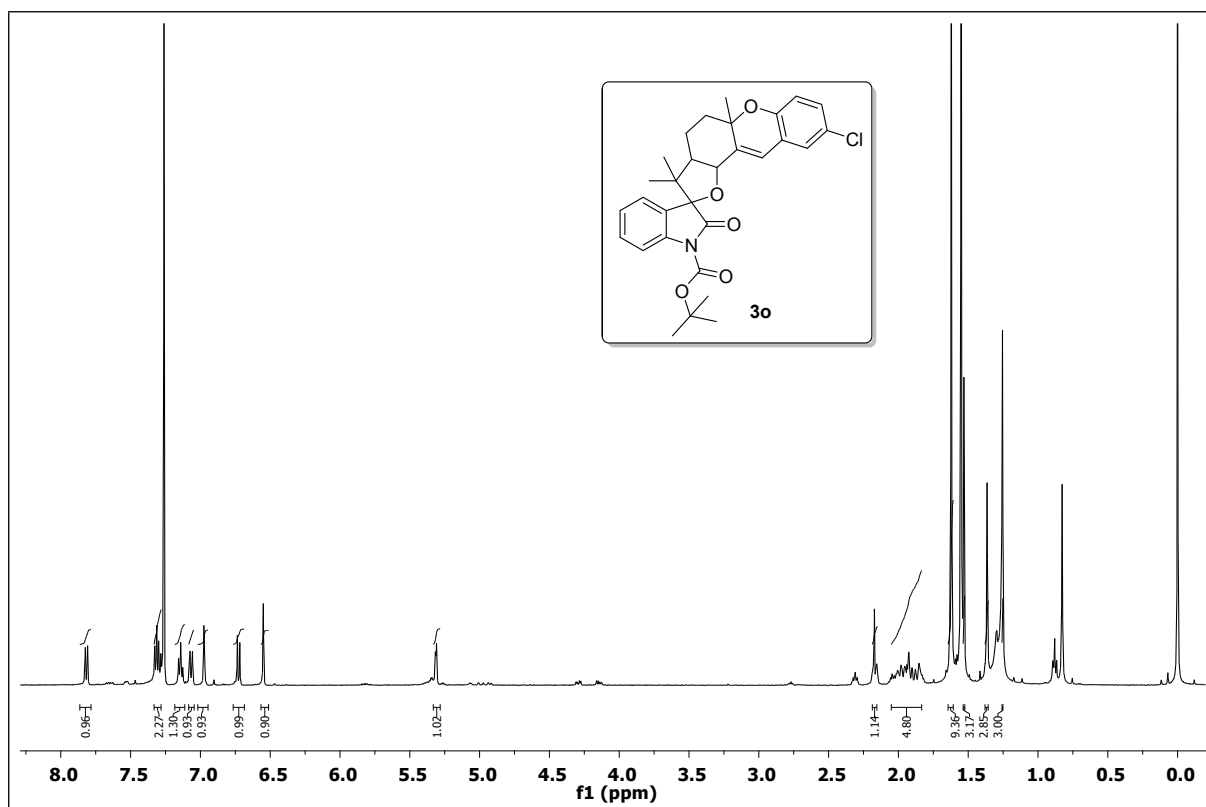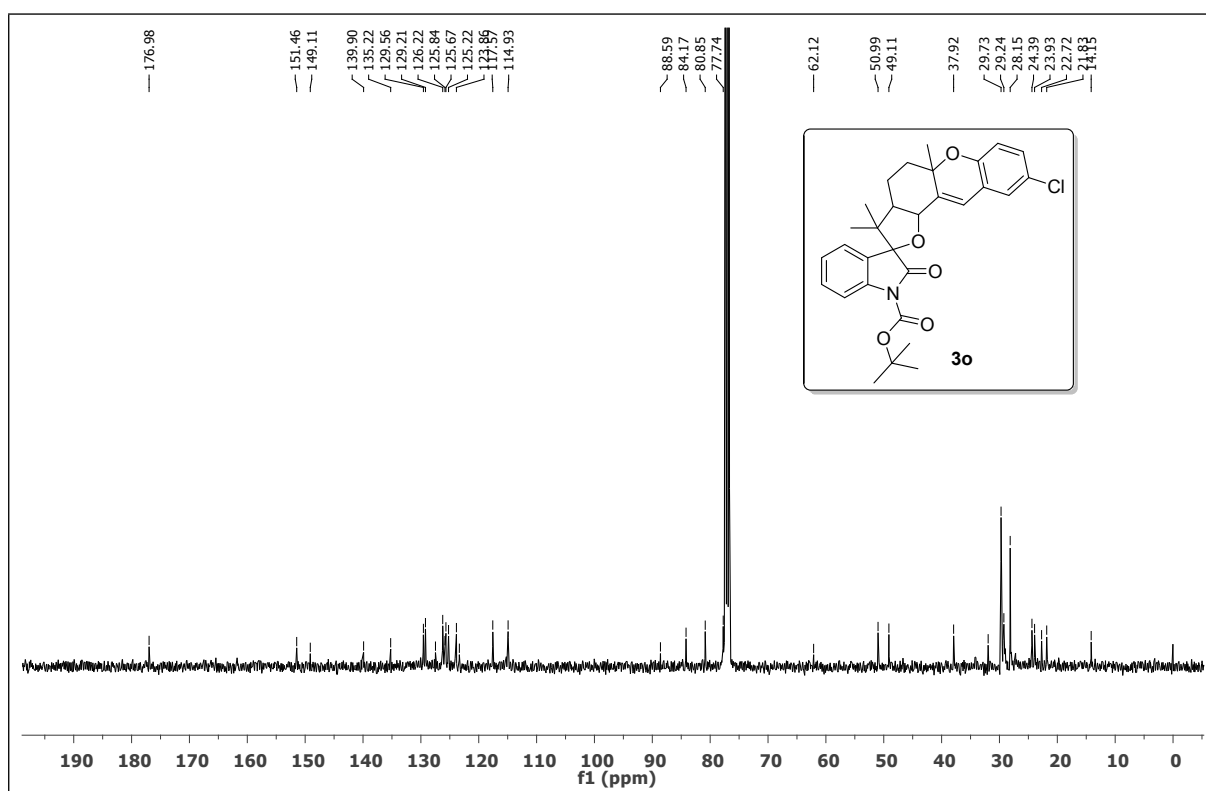

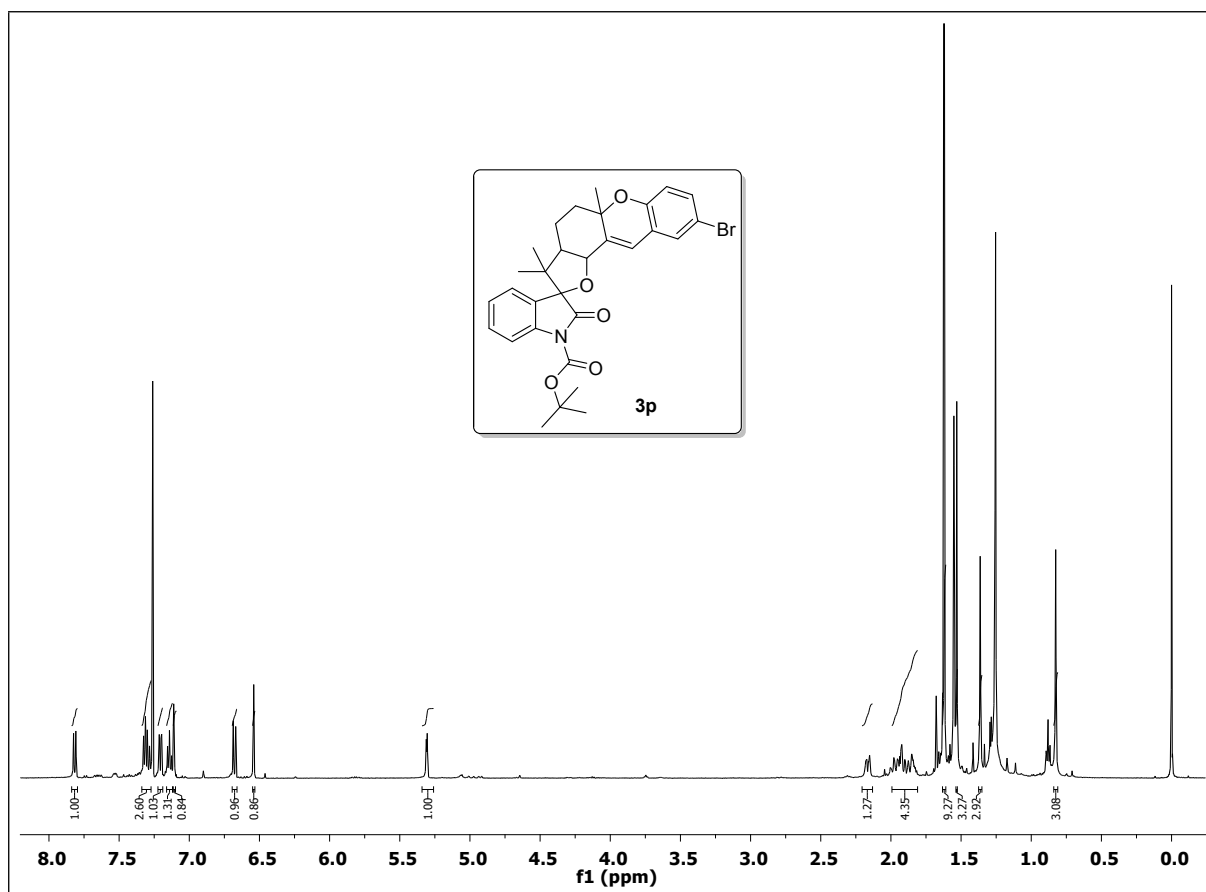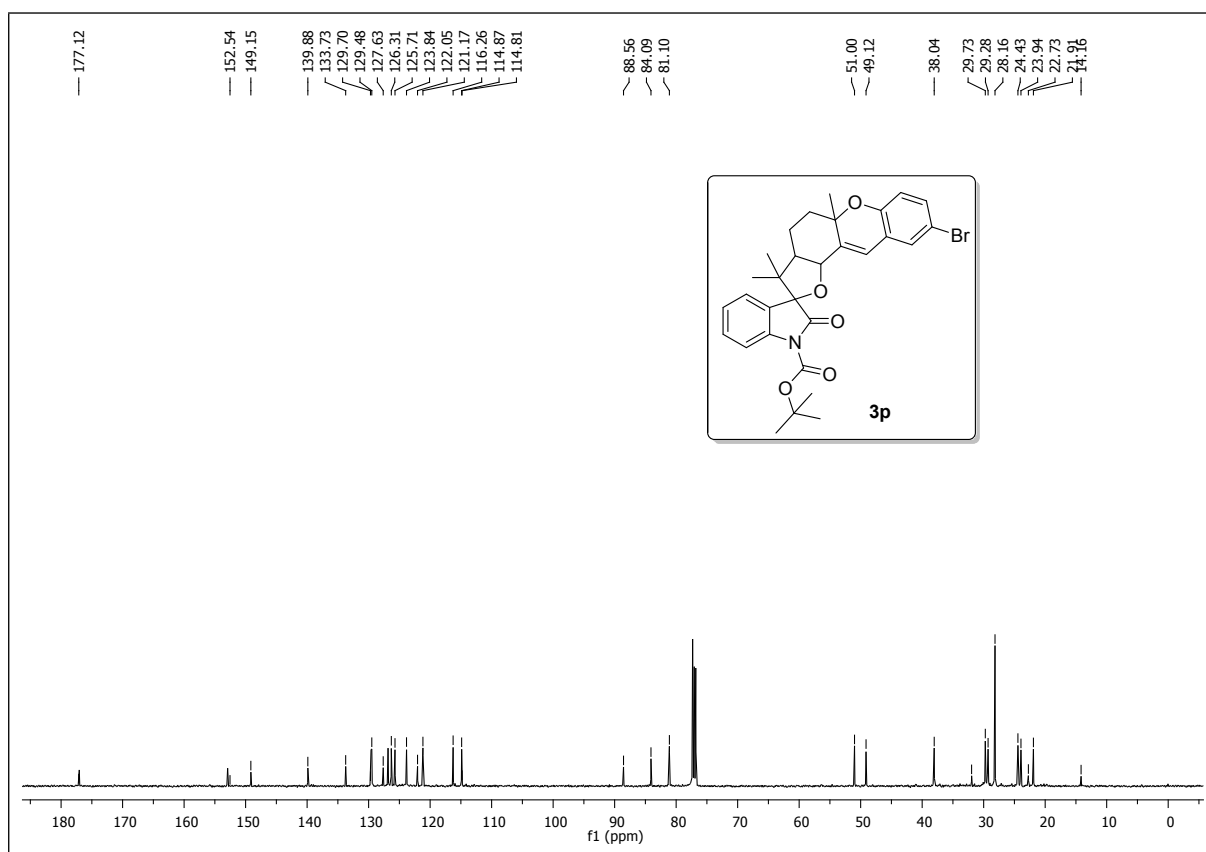

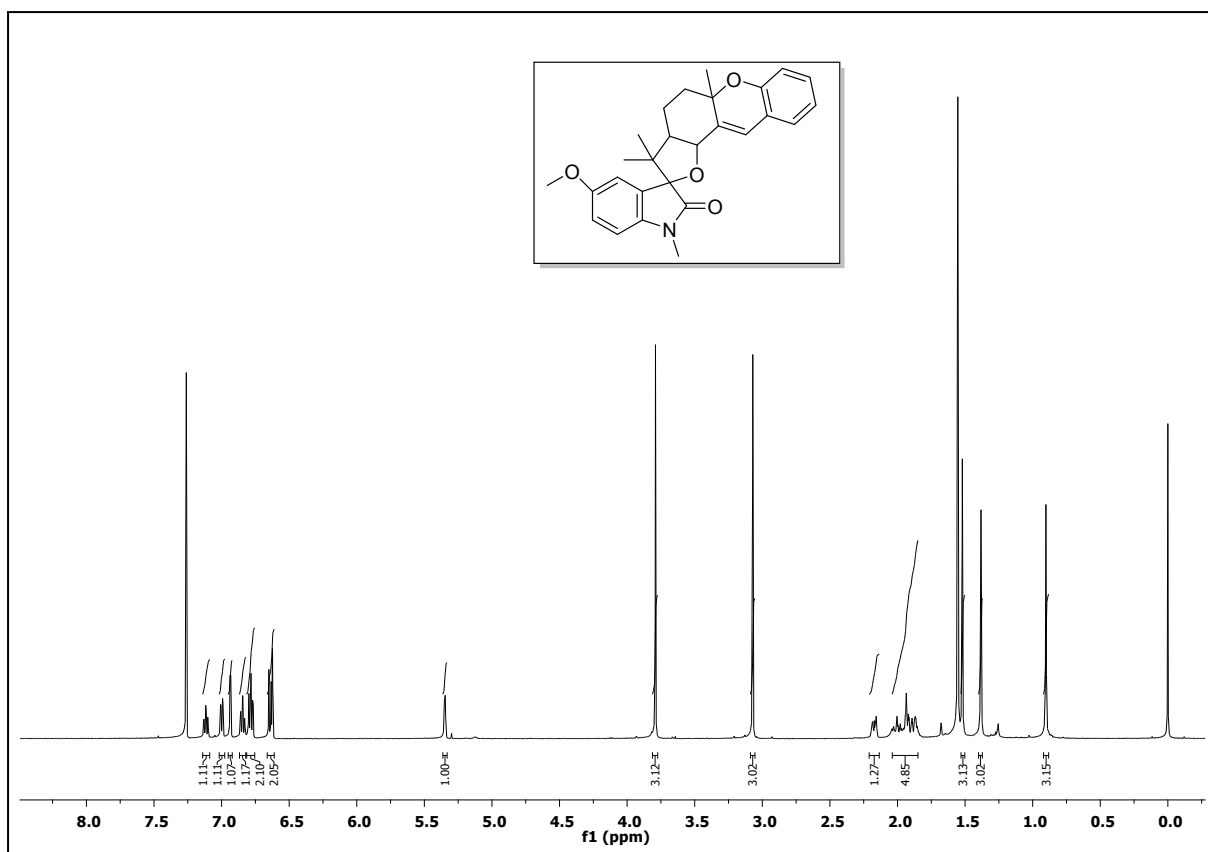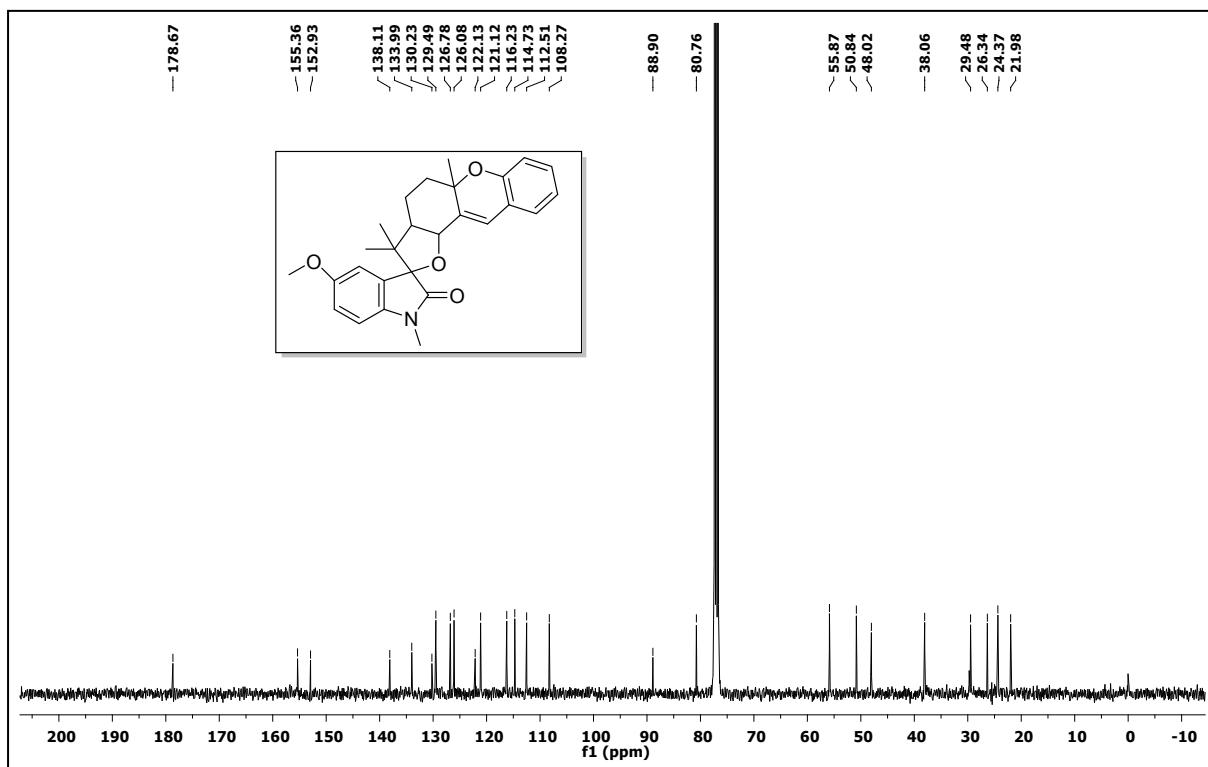

## 5. X-ray Crystallography

X-ray data for the compounds were collected at room temperature using a Bruker Smart Apex CCD diffractometer with graphite monochromated MoK $\alpha$  radiation ( $\lambda=0.71073\text{\AA}$ ) with  $\omega$ -scan method [1]. Preliminary lattice parameters and orientation matrices were obtained from four sets of frames.

Integration and scaling of intensity data were accomplished using SAINT program [1]. The structure was solved by direct methods using SHELXS [2] and refinement was carried out by full-matrix least-squares technique using SHELXL [2]. Anisotropic displacement parameters were included for all non-hydrogen atoms. All H atoms were positioned geometrically and treated as riding on their parent C atoms [C-H = 0.93-0.97  $\text{\AA}$  and  $U_{\text{iso}}(\text{H}) = 1.5U_{\text{eq}}(\text{C})$  for methyl H or  $1.2U_{\text{eq}}(\text{C})$  for other H atoms]. The methyl groups were allowed to rotate but not to tip.

**Crystal Data for 3j:** C<sub>32</sub>H<sub>30</sub>NO<sub>3</sub>Br ( $M=556.48$ ): monoclinic, space group P2<sub>1</sub>/n (no. 14),  $a = 12.0331(11)\text{\AA}$ ,  $b = 13.3098(13)\text{\AA}$ ,  $c = 17.0383(16)\text{\AA}$ ,  $\beta = 103.742(2)^\circ$ ,  $V = 2650.7(4)\text{\AA}^3$ ,  $Z = 4$ ,  $T = 294.15\text{ K}$ ,  $\mu(\text{MoK}\alpha) = 1.585\text{ mm}^{-1}$ ,  $D_{\text{calc}} = 1.394\text{ g/mm}^3$ , 30408 reflections measured ( $3.758 \leq 2\theta \leq 56.578$ ), 6390 unique ( $R_{\text{int}} = 0.0360$ ) which were used in all calculations. The final  $R_1$  was 0.0444 ( $I > 2\sigma(I)$ ) and  $wR_2$  was 0.1176 (all data). CCDC 1451304 contains supplementary Crystallographic data for the structure. These data can be obtained free of charge at [www.ccdc.cam.ac.uk/conts/retrieving.html](http://www.ccdc.cam.ac.uk/conts/retrieving.html) [or from the Cambridge Crystallographic Data Centre (CCDC), 12 Union Road, Cambridge CB2 1EZ, UK; fax: +44(0) 1223 336 033; email: [deposit@ccdc.cam.ac.uk](mailto:deposit@ccdc.cam.ac.uk)].

1. Bruker (2001). SAINT (Version 6.28a) & SMART (Version 5.625). Bruker AXS Inc., Madison, Wisconsin, USA.
2. Sheldrick G. M. (2015) Acta Crystallography C71: 3-8.

**Figure 2.** A view of **3j**, showing the atom-labelling scheme. Displacement ellipsoids are drawn at the 30% probability level and H atoms are represented by circles of arbitrary radii.





**(E)-Ethyl 7-((tetrahydro-2H-pyran-2-yl)oxy)hept-2-enoate**

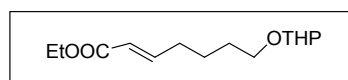

$^1\text{H}$  NMR (400 MHz,  $\text{CDCl}_3$ )  $\delta$  6.97 (dt,  $J = 15.6, 6.9$  Hz, 1H), 5.83 (dt,  $J = 15.6, 1.5$  Hz, 1H), 4.57 (t,  $J = 3.5$  Hz, 1H), 4.18 (q,  $J = 7.2$  Hz, 2H), 3.86 (ddd,  $J = 11.1, 7.6, 3.4$  Hz, 1H), 3.75 (dt,  $J = 9.8, 6.4$  Hz, 1H), 3.54 – 3.47 (m, 1H), 3.44 – 3.35 (m, 1H), 2.24 (qd,  $J = 7.2, 1.5$  Hz, 2H), 1.82 (ddd,  $J = 10.2, 8.0, 4.4$  Hz, 1H), 1.75 – 1.52 (m, 9H), 1.31 – 1.27 (m, 3H).  $^{13}\text{C}$  NMR (101 MHz,  $\text{CDCl}_3$ )  $\delta$  166.69, 148.97, 121.50, 98.85, 67.11, 62.31, 60.13, 31.96, 30.73, 29.22, 25.48, 24.81, 19.63, 14.27.

**(E)-2-((7-(Benzyloxy)hept-5-en-1-yl)oxy)tetrahydro-2H-pyran**

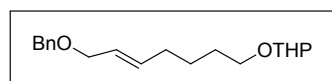

$^1\text{H}$  NMR (500 MHz,  $\text{CDCl}_3$ )  $\delta$  7.37 – 7.31 (m, 4H), 7.30 – 7.25 (m, 1H), 5.78 – 5.54 (m, 2H), 4.57 (dd,  $J = 4.2, 3.0$  Hz, 1H), 4.50 (d,  $J = 5.7$  Hz, 2H), 3.97 (dd,  $J = 6.1, 0.9$  Hz, 2H), 3.89 – 3.81 (m, 1H), 3.77 – 3.69 (m, 1H), 3.52 – 3.46 (m, 1H), 3.38 (dq,  $J = 9.7, 6.3$  Hz, 1H), 2.13 – 2.06 (m, 2H), 1.87 – 1.77 (m, 1H), 1.73 – 1.68 (m, 1H), 1.64 – 1.45 (m, 9H).

**(E)-Hepta-2,6-dien-1-ol**

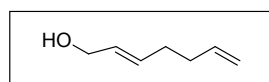

$^1\text{H}$  NMR (400 MHz,  $\text{CDCl}_3$ )  $\delta$  5.88 – 5.73 (m, 1H), 5.72 – 5.61 (m, 2H), 5.05 – 4.95 (m, 2H), 4.09 (d,  $J = 4.6$  Hz, 2H), 2.17 – 2.13 (m, 4H).  $^{13}\text{C}$  NMR (101 MHz,  $\text{CDCl}_3$ )  $\delta$  138.07, 132.43, 129.41, 114.87, 63.75, 33.28, 31.56.

**(E)-Hepta-2,6-dienal**

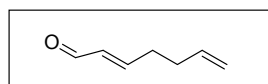

$^1\text{H}$  NMR (400 MHz,  $\text{CDCl}_3$ )  $\delta$  9.50 (d,  $J = 7.9$  Hz, 1H), 6.86 (dt,  $J = 15.6, 6.7$  Hz, 1H), 6.15 (ddt,  $J = 15.6, 7.9, 1.5$  Hz, 1H), 5.81 (ddt,  $J = 16.8, 10.2, 6.5$  Hz, 1H), 5.10 – 5.02 (m, 2H),

2.49 – 2.40 (m, 2H), 2.28 (dd,  $J = 13.6, 7.0$  Hz, 2H).  $^{13}\text{C}$  NMR (101 MHz,  $\text{CDCl}_3$ )  $\delta$  194.32, 157.81, 136.62, 133.31, 116.00, 31.82, 20.71.

## 2-(But-3-en-1-yl)-2*H*-chromene-3-carbaldehyde

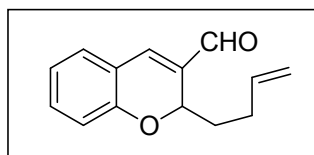

$^1\text{H}$  NMR (500 MHz,  $\text{CDCl}_3$ )  $\delta$  9.50 (s, 1H), 7.59 – 7.50 (m, 1H), 7.34 – 7.26 (m, 1H), 7.25 – 7.19 (m, 1H), 7.05 – 6.97 (m, 1H), 6.84 (dt,  $J = 15.6, 6.7$  Hz, 1H), 6.17 – 6.10 (m, 1H), 5.85 – 5.76 (m, 1H), 5.10 – 5.03 (m, 2H), 2.49 – 2.40 (m, 2H), 2.28 (dt,  $J = 13.5, 6.7$  Hz, 2H).

## NMR spectra

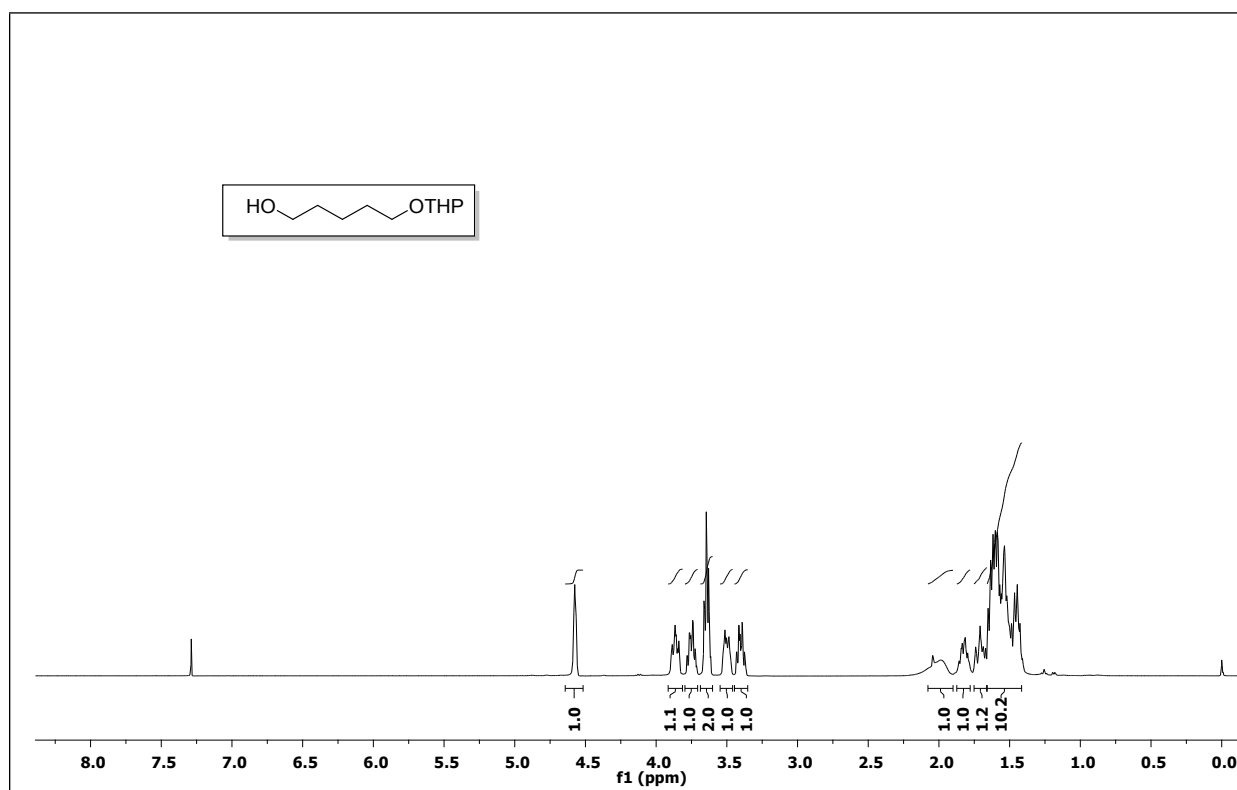

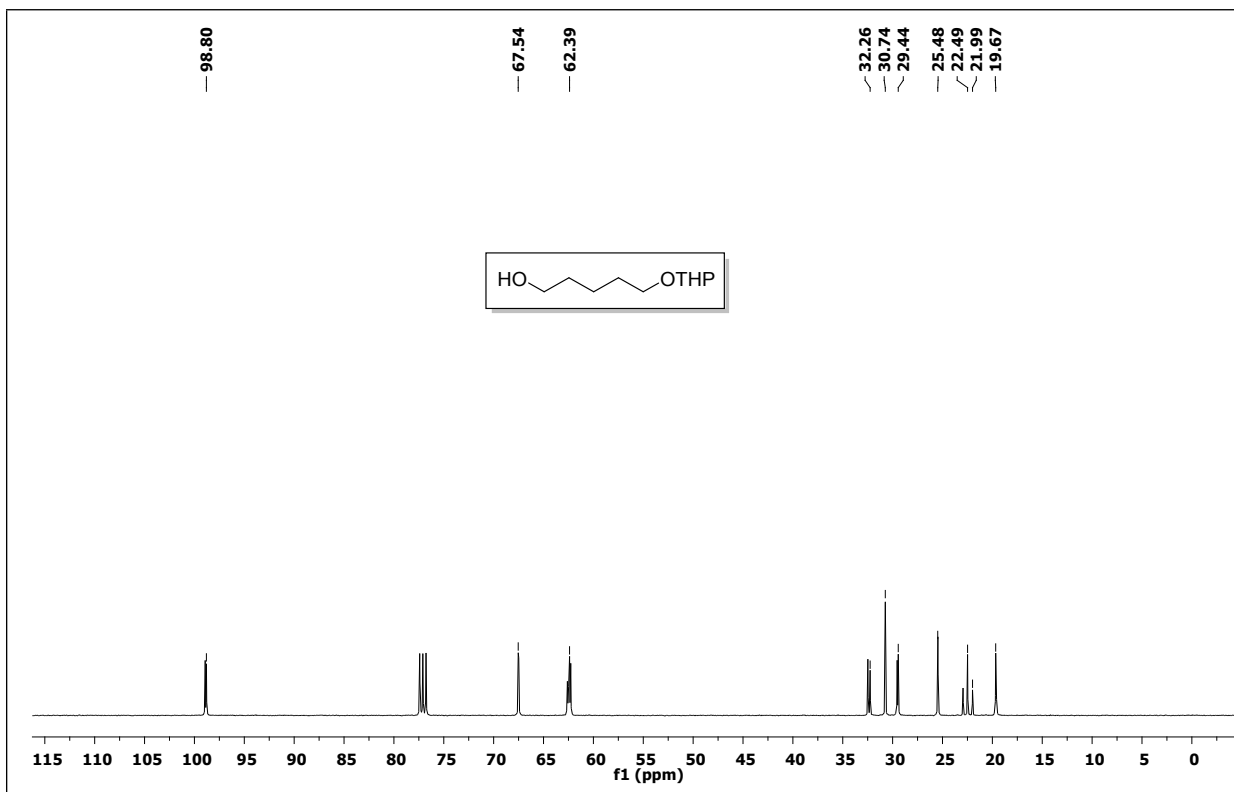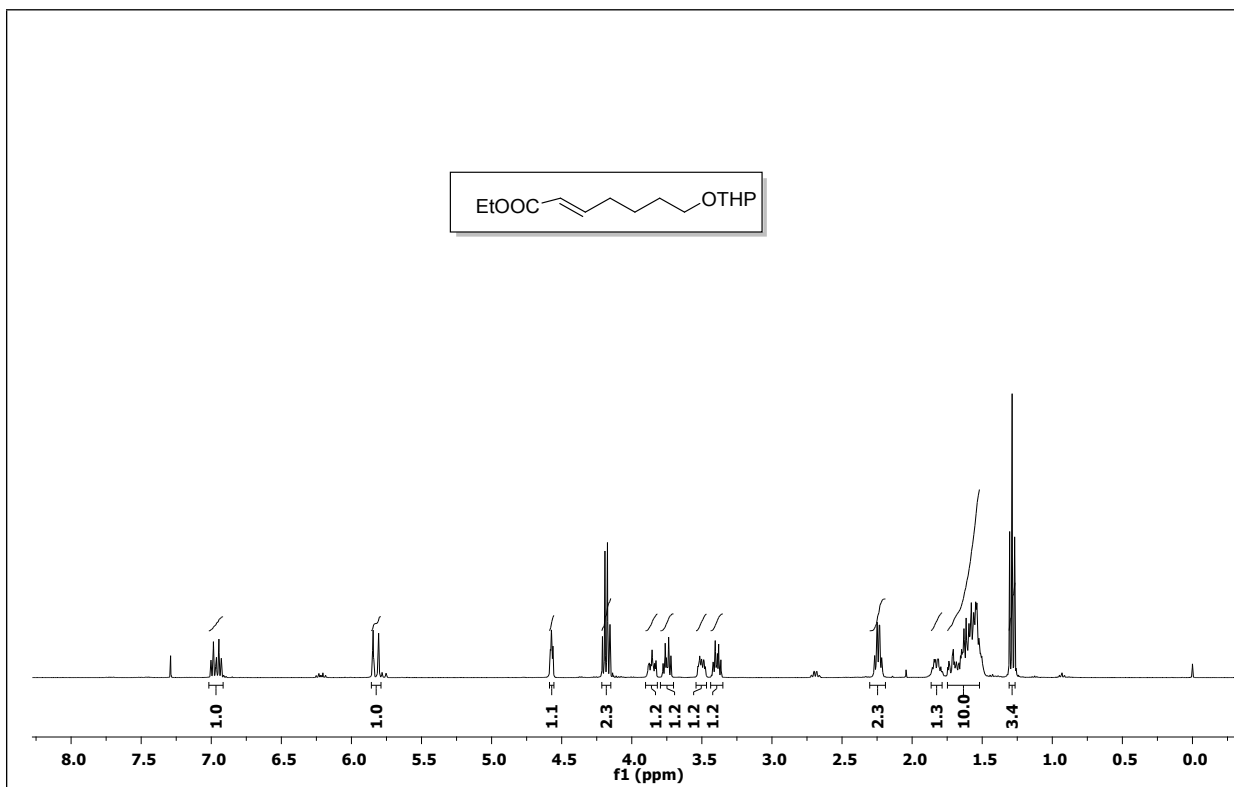

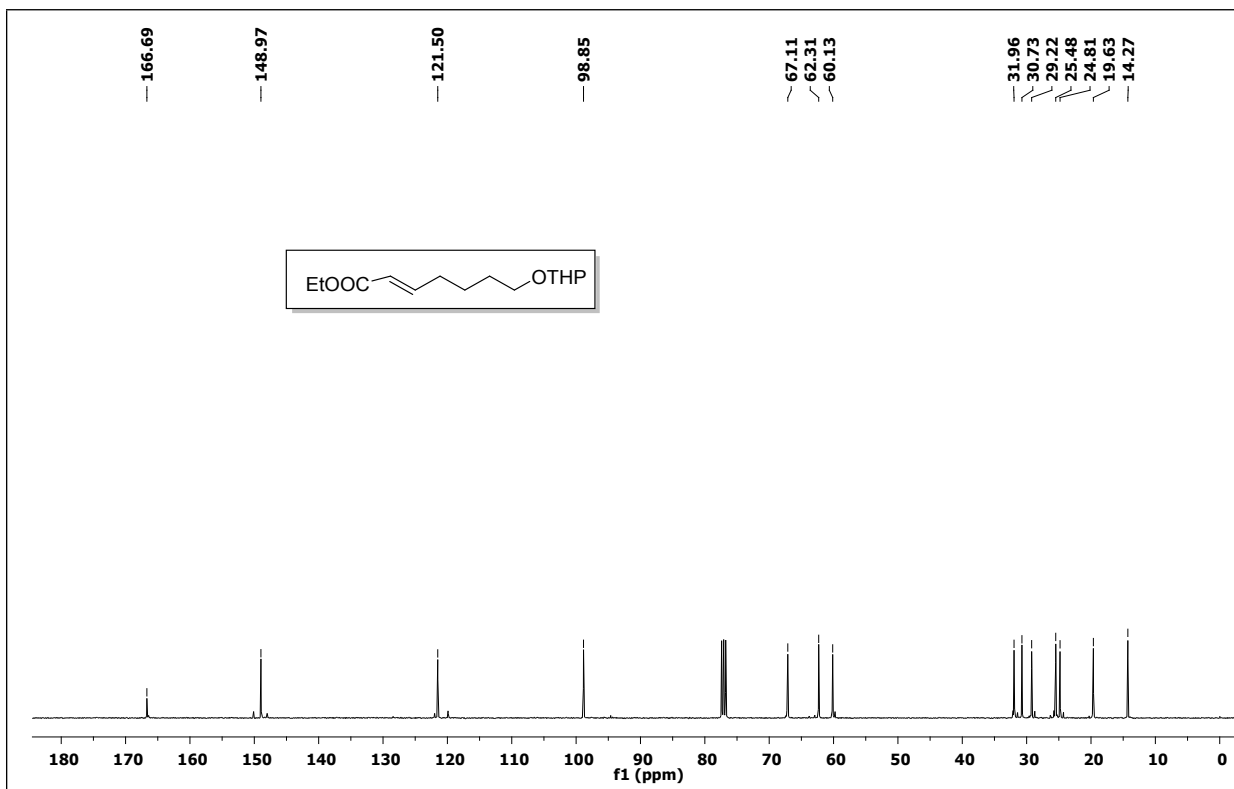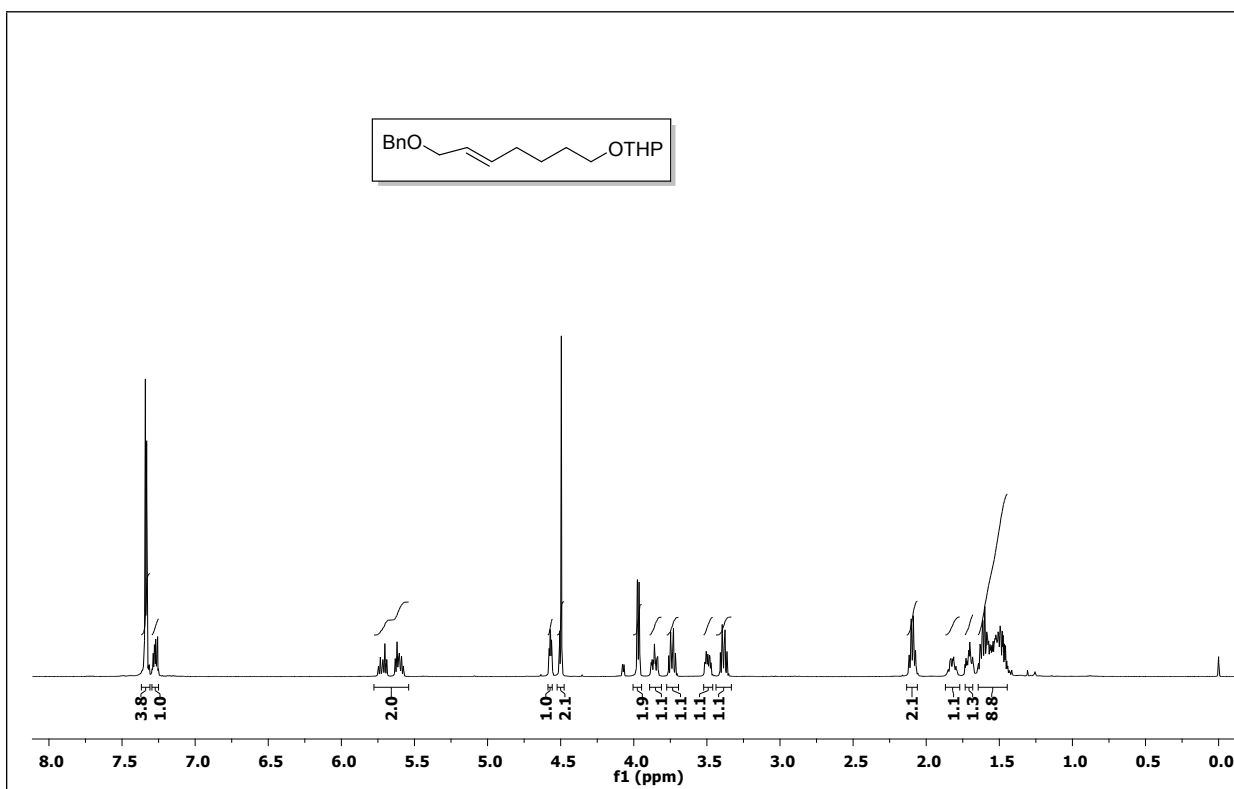

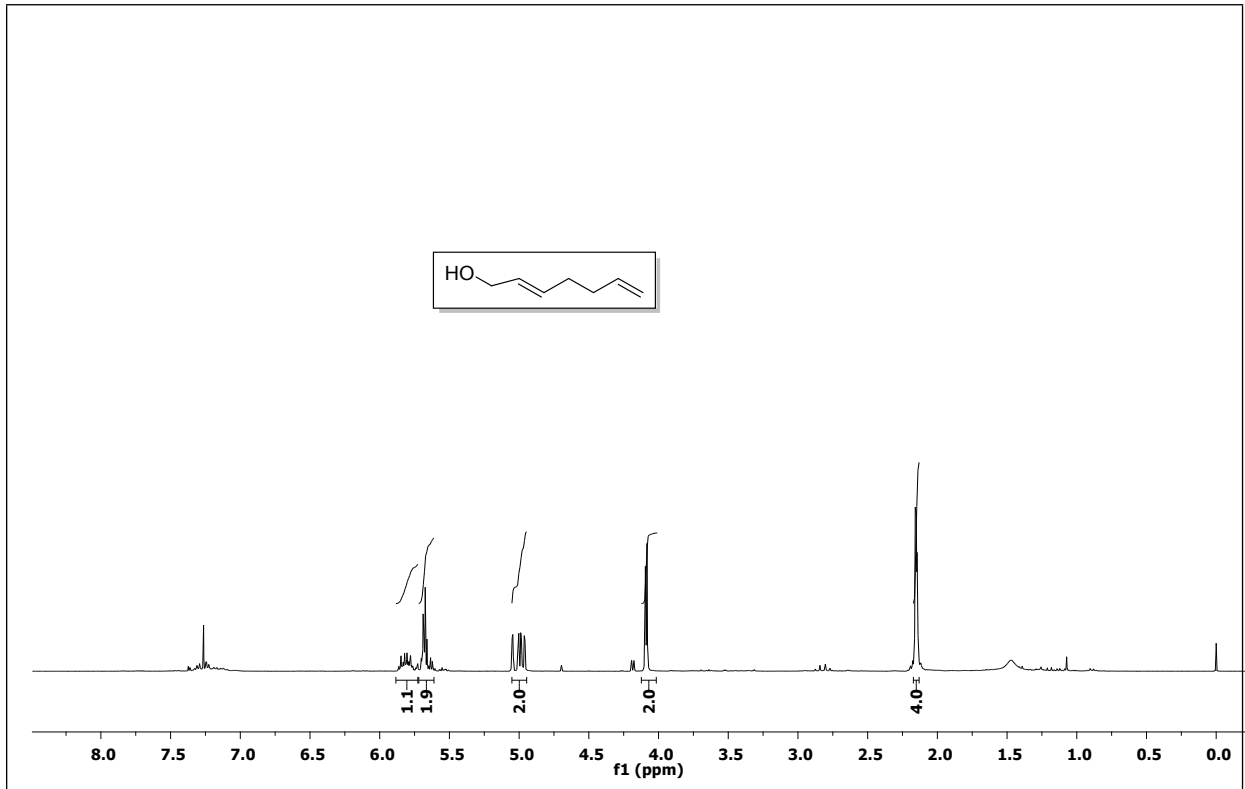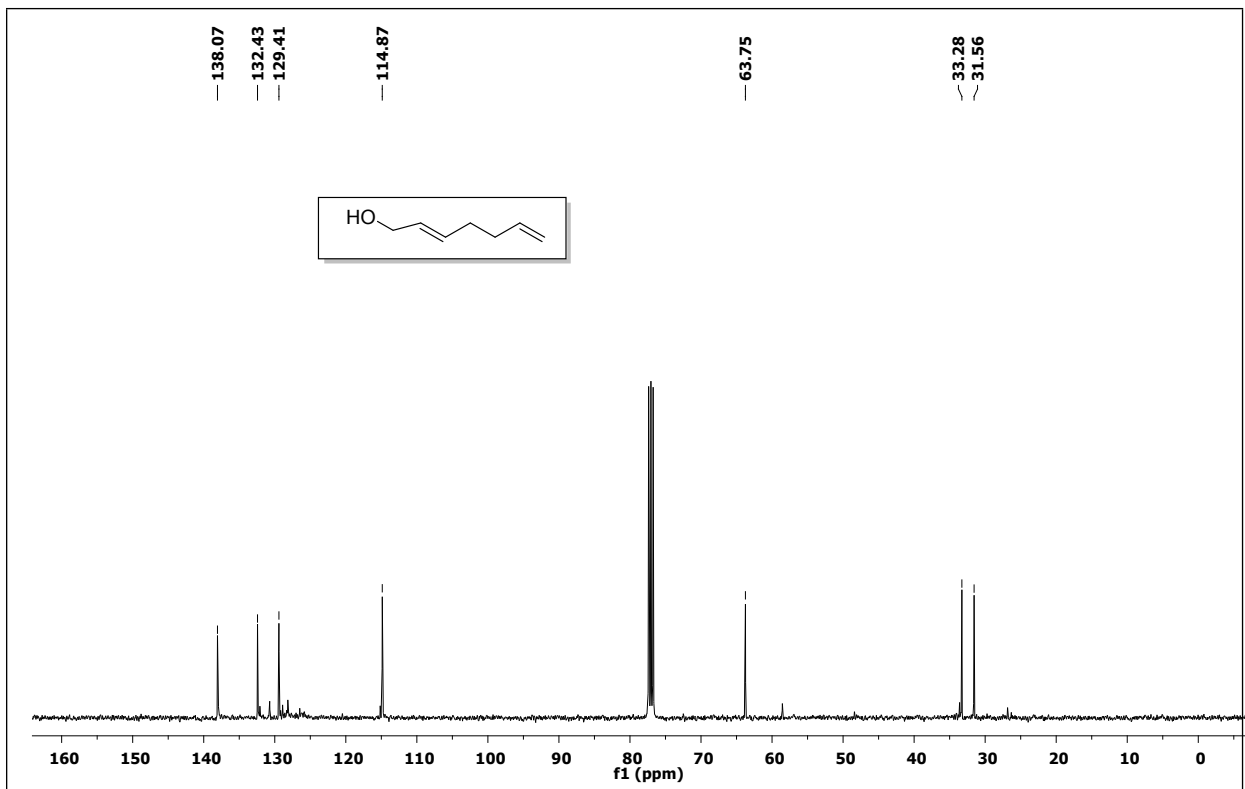

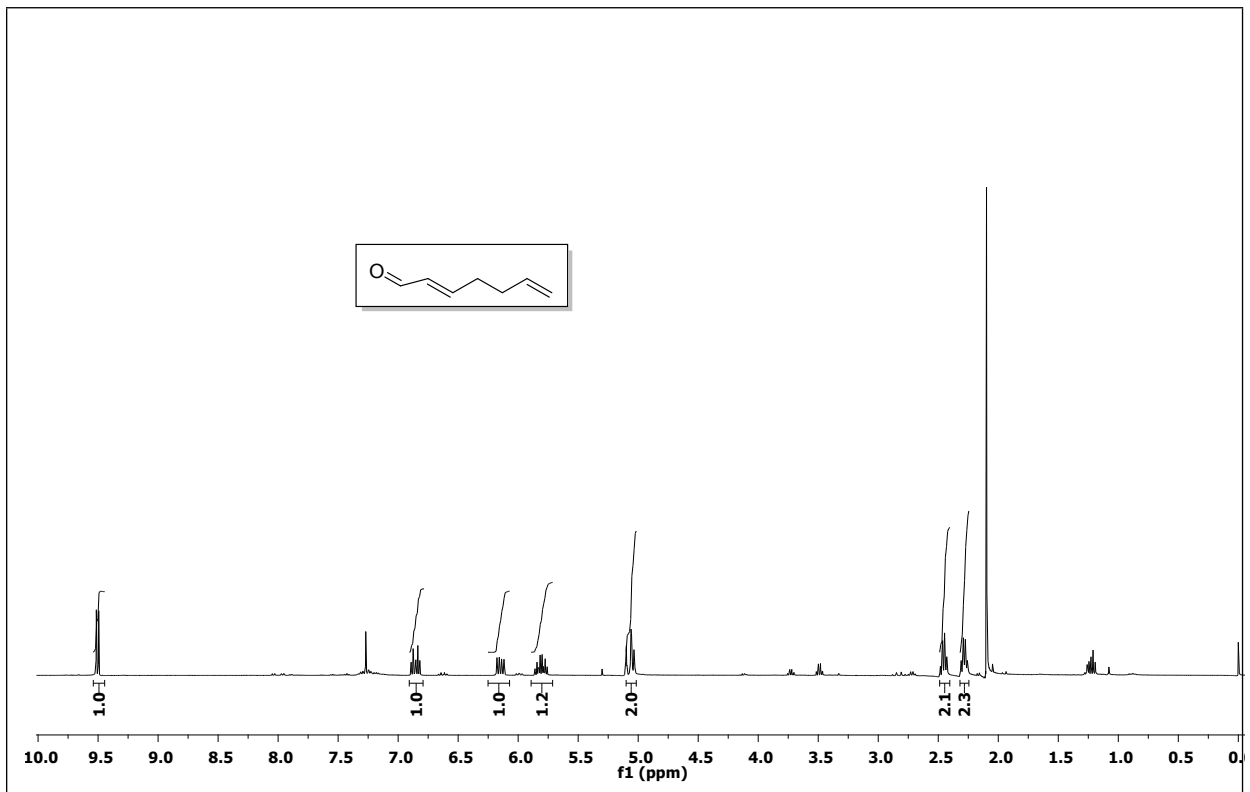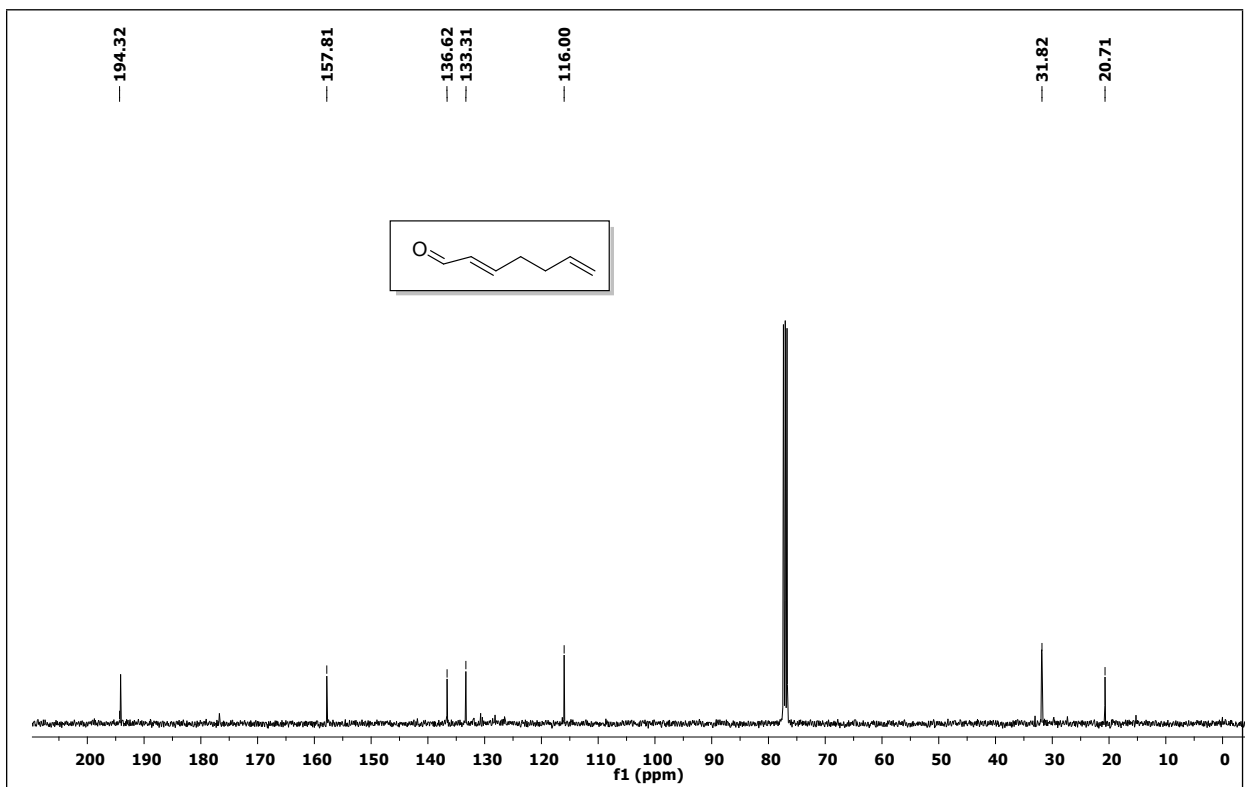

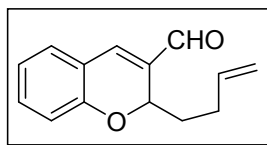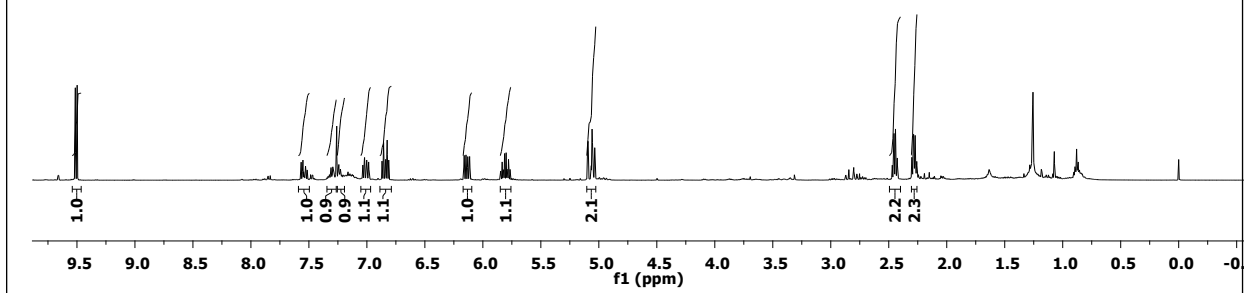

Supplement: c6ra05661j1.pdf [file c6ra05661j1.pdf]
